# Supplementary material for: The Spatial Organization of Bacterial Transcriptional Regulatory Networks
Source: Microorganisms. 2022 Nov 30;10(12):2366. doi: 10.3390/microorganisms10122366 (PMC9787925; doi:10.3390/microorganisms10122366)
Supplement: Supplementary file 1 [file microorganisms-10-02366-s001.zip › Supplementary_Data.xlsx]

## Sheet: Ecoli-TRN
TF	TG	RegType
ecpR	fliZ	-
cpxR	csgA	-
soxS	acrB	+
rpoD	lexA	+
paaX	paaG	-
rpoD	murG	+
bluR	ymgA	-
mntR	rybA	-
rpoD	fepC	+
lacI	lacY	-
ihfB	fimG	+
rpoD	ascB	+
crp	citG	-
cra	cyoA	-
rpoD	serC	+
rpoD	nuoH	+
rpoD	recF	+
rpoH	ybfE	+
crp	gabD	+
flhC	napD	+
purR	speB	-
lsrR	lsrG	-
flhC	fliG	+
rpoD	nusA	+
hupA	galK	-
glnG	ddpA	+
rpoS	htrE	+
rpoD	lldD	+
mqsA	mqsA	-
rpoD	nemR	+
oxyR	oxyR	-
rpoD	rpiB	+
rpoD	gutM	+
crp	yaeQ	-
rcsA	wza	+
nsrR	rffH	-
rpoD	tyrR	+
dpiA	citG	+
phoP	metL	+
rpoN	hypB	+
crp	tdcE	+
fur	sucD	+
torR	torC	+
narL	hyaD	-
crp	dcuR	+
fnr	caiE	+
arcA	aceB	-
arcA	hyaF	+
narL	nrfB	+-
yqhC	yqhD	+
marA	marA	+
lrp	kbl	+
phoP	nagA	+
ihfA	sufD	+
rpoH	creA	+
zntR	zntA	+
soxS	poxB	+
rcsA	yjbG	+
crp	paaC	+
fis	rrfC	+
arcA	rhaT	-
rpoD	rplC	+
rpoD	gloA	+
hupB	mtr	-
rpoH	ycjY	+
crp	gcvP	+
fur	ompF	+
oxyR	sufC	+
nsrR	rffT	-
nagC	umpH	-
rpoD	waaY	+
rpoD	efeU_1	+
cra	cysG	-
rpoD	osmY	+
lrp	fimA	+
cysB	ssuD	-
cysB	cysK	+
rpoD	napB	+
nagC	glmS	+-
crp	fucI	+
rpoN	hyfR	+
nagC	ydeN	-
rpoD	rydC	+
rpoD	sibD	+
crp	ppiA	+-
hyfR	hyfR	+
ihfB	norW	+-
fnr	nikB	+
fnr	garK	+
rpoS	csgF	+
ihfB	nrfA	+-
marA	purA	-
rpoS	rraA	+
arcA	citF	-
rpoE	pdxA	+
fliA	fliF	+
crp	hyfI	+
rpoS	fbaB	+
fadR	fabB	+
birA	bioD	-
rpoD	acrZ	+
rpoD	galT	+
ihfB	gcd	+
fnr	glpT	+
arcA	caiD	+
rpoD	metZ	+
fur	rnpB	-
araC	araE	+
hns	proW	-
fnr	ssuA	+
nac	ydcU	+
rpoD	argD	+
phoP	ydeO	-
rpoH	rrfC	+
rpoD	ivbL	+
feaR	feaB	+
crp	mtlA	+
mraZ	rsmH	-
narL	ydhV	-
rpoD	dmsB	+
narL	hybB	-
ihfA	csgF	+
dcuR	dpiB	+
narP	ydhT	-
mngR	mngA	-
rpoD	entE	+
phoB	phnD	+
lrp	livK	-
ihfA	fimD	+
phoB	phnE_2	+
ihfB	glcE	+
rpoD	glpB	+
leuO	casA	+
rpoD	glcG	+
cysB	cysW	+
ihfB	nuoE	-
crp	fucU	+
rpoN	hisP	+
crp	cstA	+
rpoH	dnaJ	+
rpoN	hycE	+
fliZ	csgA	-
fnr	cheY	+
ihfB	paaF	+
fis	leuX	+
rpoE	phoQ	+
cpxR	sbmA	+
fis	nrdB	+
ihfB	sucD	-
rpoD	allE	+
cra	cydA	+
ihfA	nirB	+-
fis	xylR	-
narL	yeaR	+
rpoD	gspG	+
rpoH	adiC	+
fis	nrfG	-
rpoD	pqiB	+
dhaR	dhaL	+
lrp	ilvA	-
phoP	rutA	+
fnr	ynfF	+
cbl	tauA	+
ihfB	tdcA	+
fur	sdhD	+
idnR	idnK	+
caiF	caiD	+
rpoE	yghF	+
rpoD	caiC	+
rpoD	preA	+
crp	murP	+
rpoS	ydcS	+
rpoD	cadB	+
ihfA	sgbE	+
rpoD	paaA	+
rpoD	hybO	+
rpoS	patA	+
cpxR	slt	+
rpoD	idnK	+
rpoH	lon	+
soxS	ybjN	+
iscR	erpA	-
rpoE	narV	+
arcA	cadB	-
lexA	cho	-
crp	mhpB	+
rpoD	pgpB	+
ihfB	atoB	+
flhD	fliQ	+
tdcA	tdcF	+
modE	hycB	+
betI	betA	-
rpoD	phoH	+
stpA	bglF	-
rpoE	malQ	+
lrp	hdeA	-
flhC	fliI	+
gadE	purA	+
fnr	fnrS	+
modE	deoC	-
rpoE	yfeY	+
fur	oppF	-
crp	envZ	+-
nikR	nikC	-
narL	dmsA	-
arcA	hybB	-
rpoH	rlmE	+
rpoD	ilvB	+
soxS	marA	+
rpoH	rrlB	+
crp	acnA	+
rpoD	cbl	+
nhaR	pgaA	+
ihfB	yiaM	+
ihfB	flhD	-
cysB	tauB	+
rpoD	folA	+
crp	rhaR	+
basR	qseB	+
rpoD	melR	+
lrp	rrfA	-
rpoD	nrdD	+
uxuR	uxuR	-
baeR	spy	+
rpoD	mdh	+
fur	fhuB	-
ihfA	lyxK	+
accB	accB	-
fis	actP	-
rpoD	flgH	+
gntR	idnK	-
rpoE	yoaC	+
rpoE	yiaO	+
rpoH	alaA	+
ecpR	fliY	-
gadE	gadC	+
rpoD	cpdB	+
rpoD	cyaA	+
rpoD	murF	+
crp	nfuA	+
rpoN	gltI	+
rpoD	esrE	+
crp	citD	-
narL	nuoN	+
rpoE	sbmA	+
cra	cyoB	-
rpoD	nuoG	+
fliZ	hdeA	-
gadW	mdtE	+
arcA	puuP	-
rpoD	gadE	+
glnG	ddpB	+
rpoD	mhpR	+
rpoN	rutB	+
oxyR	oxyS	+
rpoD	phnK	+
crp	yaeP	-
rpoE	ecpR	+
rpoD	trmH	+
hns	rrfC	-
rpoS	yabI	+
uidR	uidR	-
rpoD	aroP	+
dpiA	citD	+
crp	ompR	+-
exuR	uxuB	-
rpoN	hypC	+
crp	mlc	+-
torR	torD	+
rpoE	rapZ	+
fnr	caiF	+
rpoD	sbcD	+
arcA	hyaA	+
fadR	fadA	-
rpoN	prpD	+
ihfA	sufE	+
crp	fis	+-
lrp	alaT	-
ihfB	ibpB	+
fis	rrfB	+
rpoD	rplB	+
rpoD	leuD	+
ihfB	hycI	+
rpoH	ycjX	+
leuO	bglB	+
bglJ	yecT	+
flhD	gltK	+
hns	garR	-
phoB	gadX	+
nsrR	rpmI	-
rpoD	gor	+
rpoD	alaX	+
fur	entF	-
narL	cysG	+
cysB	ssuE	-
rpoD	napC	+
rbsR	rbsB	-
nagC	ydeM	-
fabR	fabA	-
phoP	yneM	+
ada	alkB	+-
rpoD	mdtF	+
tyrR	tyrR	-
kdpE	kdpF	+
rpoS	csgE	+
allR	ybbY	-
rcsA	gadA	-
idnR	gntU	-
rpoD	atpF	+
arcA	citE	-
fis	nuoA	+
crp	hyfH	+
fis	katE	-
gadX	glnK	+
dpiA	citX	+
rpoH	clpX	+
rpoD	yojI	+
flhC	fliA	+
rpoD	dusB	+
torR	hdeB	+
arcA	glpD	-
arcA	caiE	+
rpoD	metY	+
araC	araD	+-
hns	proV	-
gntR	nfuA	-
glnG	glnH	+-
rpoD	argG	+
bglJ	ykiA	+
rpoD	hemA	+
crp	gatD	+
ihfA	aceK	+
rpoD	pstA	+
rpoH	rrfB	+
rpoE	lon	+
rpoD	rcnA	+
crp	raiA	+
cra	aroP	+
crp	proP	+-
rpoH	yehY	+
narL	ydhW	-
nsrR	sodB	-
rcsB	bglB	+
ihfA	csgE	+
rpoD	araJ	+
rpoD	entF	+
phoB	phnC	+
mntR	mntH	-
cra	ppsA	+
arcA	ubiC	-
ecpR	fliC	-
hns	ssrS	-
rob	ybjN	+
rpoD	rimP	+
rpoD	dkgA	+
ydeO	gadE	+
ihfB	glcD	+
rpoD	glpC	+
glnG	relA	+
fis	glnU	+
marA	micF	+
rpoD	bhsA	+
phoP	gadE	+
fnr	fdnI	+-
rpoH	dnaK	+
rpoN	hycD	+
fliZ	csgF	-
marA	ybjN	+
crp	nirC	-
ilvY	ilvC	+
crp	ebgC	+
hyfR	focB	+
basR	tomB	+
lrp	argO	+
rpoD	gspF	+
rpoH	dsbC	+
fis	nrfF	-
hns	appY	-
rpoD	yciW	+
rpoD	pqiA	+
dhaR	dhaM	+
rpoD	bssS	+
fur	garR	-
fis	alaW	+
dcuR	frdA	+
phoP	rutB	+
fnr	ynfG	+
cbl	tauB	+
rpoD	emrB	+
rpoH	hfq	+
rpoD	folE	+
pdhR	glcA	-
caiF	caiE	+
rpoE	recR	+
ihfA	fimA	+
fhlA	hyfJ	+
crp	murQ	+
crp	puuR	-
rpoD	cpxP	+
ihfB	uspB	-
rpoD	mntP	+
rpoH	yceI	+
rpoD	dnaN	+
ihfA	yiaM	+
rpoD	purD	+
rpoD	greA	+
fis	marB	+
arcA	cadA	-
cra	yeaD	-
ihfB	atoA	+
flhD	fliP	+
rpoS	ddpD	+
qseB	flhD	+
rob	micF	+
modE	hycA	+
narL	yoaG	+
crp	csgE	+
fis	dmsC	-
lrp	hdeB	-
rpoN	nikA	+
rpoD	uvrY	+
lrp	ilvG_2	-
modE	deoB	-
gadW	gadC	+-
rpoD	livJ	+
arcA	hybC	-
rpoS	rsmG	+
pgrR	ymjD	-
rpoD	ilvC	+
yoeB	yoeB	-
rcsB	leuO	+
ihfB	yiaN	+
fis	proK	+
cysB	tauA	+
hns	gspF	-
rbsR	rbsA	-
crp	sohB	-
rpoH	ymjD	+
gadE	dctR	+
rhaS	rhaT	+?
oxyR	dps	+
rpoN	ibpB	+
rpoD	sroA	+
lrp	dadA	-
rpoD	gltX	+
rpoD	nupC	+
rpoD	nrdG	+
murR	murR	+-
fur	fhuE	-
nsrR	fhlA	-
fis	cysG	-
accB	accC	-
narL	fdnG	+
fnr	bcsB	+
rpoD	sgbE	+
rpoD	hscB	+
cpxR	mdtA	+
narL	narJ	+
rpoE	yiaN	+
ihfA	tdcG	+
cpxR	csgG	-
rpoD	pabA	+
paaX	paaA	-
fliA	prs	+
rpoS	yciG	+
rpoD	fepA	+
fis	metY	+
rpoD	proX	+
crp	araH	+
crp	citE	-
narL	nuoA	+
rpoS	cfa	+
cra	cyoC	-
rpoD	serA	+
rpoN	flhD	+
rpoD	recD	+
flhD	napB	+
fur	fes	-
flhC	napF	+
crp	xylH	+
nagC	dinI	-
rpoE	ptsN	+
ascG	prpR	-
rpoD	glxK	+
hupA	galE	-
glnG	ddpC	+
rpoS	yccJ	+
fis	glyU	+
hyfR	hyfH	+
rpoD	cmk	+
rpoD	phnJ	+
rcsA	wzc	+
rpoD	argC	+
rpoD	fliD	+
phoP	ygiA	+
fis	carB	+
rpoD	ybaO	+
rpoD	arfA	+
rpoD	lacI	+
rpoD	tyrP	+
dpiA	citE	+
rpoD	aceF	+
nsrR	sufE	-
leuO	leuD	+
allS	allE	+
rpoD	mngR	+
ihfA	glpQ	-
narL	hyaF	-
rpoD	umpH	+
rpoD	glgP	+
rpoD	sbcC	+
fur	fecD	-
fis	thrU	+
fis	serX	+
rpoD	cusF	+
rpoN	potF	+
rpoH	creC	+
evgA	yfdE	+
rpoS	rssA	+
fnr	hyfR	-
rcsA	gadB	+
fur	nac	-
mlrA	cadC	+
fis	rrfE	+
fis	nuoN	+
galS	galE	+-
ihfB	hycH	+
cueR	cueO	+
cpxR	spy	+
crp	sodA	+
ihfA	osmY	-
rpoD	narG	+
deoR	tsx	-
crp	srlE	+
lrhA	lrhA	+
ihfA	dps	+
flhD	gltJ	+
oxyR	sufA	+
crp	aaeX	+
hns	rrlG	-
iclR	aceK	-
rpoD	kdsD	+
lrp	fimG	+
rpoD	cysA	+
rpoD	nohA	+
rpoD	glpX	+
rpoD	recX	+
fur	entA	-
crp	trg	+
cysB	cysM	+
nagC	glmU	+-
crp	fucK	+
fliA	cheW	+
rpoN	hisJ	+
rpoS	pfkB	+
fabR	fabB	-
rpoD	aspV	+
rpoD	sibB	+
fis	malE	+
ada	alkA	+
purR	ubiX	-
tyrR	aroP	-
fnr	nuoE	-
kdpE	kdpA	+
zur	zinT	-
rpoS	csgD	+
rpoD	atpG	+
arcA	citD	-
rpoS	tolC	+
rpoS	gadA	+
fliA	fliH	+
rpoS	adrA	+
crp	caiT	+
oxyR	dsbG	+
flhC	fliN	+
sutR	sutR	+-
rpoS	osmF	+
marA	zwf	+
narL	dcuA	-
ihfA	yadV	+
glnG	yeaH	+
araC	araG	+
narP	fdhF	+
rpoD	argF	+
mazF	mazF	-
ompR	fadL	-
gadX	dctR	+
rpoN	glnG	+
rpoH	rrfA	+
crp	aceK	-
arcA	focA	+
rpoH	yehX	+
narL	ydhX	-
rpoD	dmsD	+
ihfA	csgD	+
gadE	yhiM	+
ihfA	pflB	+
chbR	chbA	+-
hupA	tyrP	-
rpoD	prfA	+
rpoH	pphA	+
rpoS	glgA	+
rcsB	ftsA	+
rpoD	feaB	+
cynR	cynX	+
rpoD	srlA	+
lrp	osmC	+-
glnG	yhdY	+
ihfB	glcG	+
rpoD	glpD	+
cytR	tsx	-
crp	agaA	+
fis	glnV	+
mqsR	mqsR	-
arcA	mdh	-
rpoD	iscA	+
gadX	amtB	+
rcsB	lolA	+
rpoD	frdD	+
flhC	napA	+
rpoD	hisB	+
fnr	fdnH	+-
fliZ	csgG	-
rpoD	dksA	+
crp	nirB	-
ihfB	ilvL	+-
rpoD	tnaA	+
rob	nfsA	+
rpoD	ydfW	+
rpoH	raiA	+
rpoD	deaD	+
fis	proP	+
cra	glk	-
rpoD	gspE	+
mraZ	mraY	-
pdhR	ftsW	-
fis	nrfA	-
rpoD	eda	+
nagC	chbA	-
arcA	dctA	-
fis	alaV	+
phoP	rutC	+
cbl	tauC	+
glnG	glnQ	+-
rpoD	ybbW	+
ihfA	fimB	+
metJ	metL	-
rpoD	caiA	+
hns	bglB	-
rpoD	istR-2	+
rpoD	fmt	+
ihfB	yjbH	+
rpoD	glmZ	+
argP	dnaA	+
ihfA	yiaL	+
ihfA	ilvG_2	+-
fis	hlyE	-
fis	marA	+
yoeB	yefM	-
rpoD	ccmF	+
rpoD	ftsA	+
cueR	moaA	-
crp	osmY	-
rpoD	cynS	+
crp	csgD	+
rpoD	casA	+
narP	yeaR	+
fis	dmsB	-
rpoD	polB	+
oxyR	katG	+
modE	deoA	-
lrp	rrsB	-
gadW	gadB	+-
rpoD	livK	+
nikR	nikA	-
dicA	ydfD	-
rpoS	otsB	+
rpoD	coaD	+
rpoD	hflC	+
tyrR	aroL	-
crp	galK	+-
nhaR	pgaC	+
arcA	sroD	-
fnr	trmD	-
ihfB	yiaO	+
acrR	acrA	-
arcA	rplW	-
rhaS	rhaS	+?
rcsB	dctR	+
lrp	rrfC	-
rpoD	nrdF	+
rpoD	phnE_1	+
fliA	fliQ	+
cra	marB	-
crp	paaZ	+
fur	fhuD	-
srlR	gutM	-
lexA	mraY	-
rpoD	fimB	+
cpxR	skp	+
allR	gcl	-
rpoD	yrbN	+
ompR	bolA	-
rpoD	hscA	+
araC	xylA	-
narL	narK	+
rpoD	dapF	+
rpoE	yiaM	+
cpxR	csgD	-
narP	hcp	+
rpoE	lpxP	+
paaX	paaB	-
rpoS	pykF	+
crp	galP	+
rpoS	yciF	+
hns	yfaE	-
gadE	gltF	+
fnr	yeiL	-
ompR	ompF	+-
cra	cyoD	-
nanR	fimB	+
rpoD	nuoE	+
rpoD	recC	+
fis	flxA	+
flhC	napG	+
arcA	puuR	-
glnG	ddpD	+
fis	glyT	+
hyfR	hyfI	+
modE	moaA	+
rpoD	fecR	+
rpoD	phnI	+
rcsA	wzb	+
rpoD	wzyE	+
rpoD	fliE	+
nac	mnmG	-
crp	ldtB	-
rpoD	hdeD	+
rpoS	gabD	+
dcuR	fumB	+
rpoH	glnS	+
rpoN	ssnA	+
crp	dksA	+
hypT	cysH	+
fur	rpoS	-
nsrR	sufD	-
rpoN	hypA	+
allS	allD	+
fur	sucA	+
rpoD	psiE	+
rpoH	lnt	+
fur	fecE	-
fis	thrT	+
arcA	hyaC	+
dpiA	appY	-
rpoN	potG	+
cra	pgk	-
gutM	srlD	+
modE	modC	-
rpoH	creB	+
rpoS	rssB	+
narL	napH	-
fnr	yqjI	+
fis	rrfD	+
rpoD	leuZ	+
rpoD	yoeB	+
crp	sodB	-
rpoH	hflK	+
rpoD	ispH	+
rpoD	narH	+
crp	srlD	+
rpoD	ileS	+
rpoD	priB	+
flhD	gltI	+
rpoD	cyoA	+
hns	rrlD	-
rpoS	crr	+
dcuR	dctA	+
rpoD	efeU_2	+
ihfA	tyrP	-
lrp	fimF	+
rpoD	cysB	+
sutR	fliA	-
rpoE	mzrA	+
rpoD	ssnA	+
cysB	cysN	+
rpoD	napA	+
ihfA	sucA	-
rbsR	rbsD	-
gadX	hdeD	+
rpoD	cusA	+
rpoD	sibA	+
rpoS	ygiC	+
rpoD	glcA	+
fnr	garL	+
rpoS	csgC	+
xapR	xapA	+
rpoD	atpD	+
arcA	citC	-
fis	ansB	-
rpoS	gadB	+
hns	rrfH	-
fis	nuoC	+
crp	hyfJ	+
fadR	fabA	+
flhC	fliO	+
rpoH	ybeD	+
rpoD	marA	+
ihfA	hypB	+
phoP	acrB	-
rpoN	hyfI	+
narL	norV	-
rpoD	metW	+
araC	araF	+
hns	proX	-
rcsB	yhiD	+
rpoN	rutD	+
fnr	ssuD	+
rpoD	argA	+
mazF	mazG	-
rpoS	dhaR	+
purR	guaA	-
marA	pqiA	+
arcA	rpsS	-
gadX	lon	+
fur	ftnA	+
hns	rnpB	-
cpxR	motA	-
narL	ydhY	-
rpoD	cedA	+
cra	nirD	-
soxS	fumC	+
fnr	focB	-
chbR	chbB	+-
rpoD	araH	+
narL	ccmG	-
lrp	livF	-
hns	nhaR	-
fnr	rpsI	-
rpoD	yaiA	+
marA	yhiD	-
ihfB	glcF	+
nemR	nemR	-
fadR	iclR	+
rpoD	tsf	+
nsrR	hycI	-
fis	glnW	+
lexA	dinB	-
narL	citF	-
flhC	ccmF	+
fliZ	csgD	-
fnr	cheZ	+
ihfB	ilvM	+-
rpoD	tnaB	+
csgD	flgM	-
rpoE	uspD	+
crp	ebgA	+
fur	zinT	+
cra	cydB	+
rpoD	mltF	+
iscR	iscR	-
modE	napF	+
rpoD	gspD	+
rpoD	ychH	+
rpoD	dinQ	+
crp	rbfA	-
rpoD	codA	+
allR	hyi	-
rob	zwf	+
nagC	chbB	-
rpoS	blc	+
lrp	ilvL	-
fis	alaU	+
phoP	rutD	+
cbl	tauD	+
pdhR	glcG	-
fur	sdhA	+
crp	grpE	+
ihfA	fimC	+
fhlA	hyfH	+
rpoD	caiF	+
ompR	sra	-
asnC	mnmG	-
gadX	btuB	-
csgD	flgN	-
rob	inaA	+
rpoD	hybB	+
rpoD	molR_1	+
rpoD	glmY	+
hns	leuO	-
narP	ydhU	-
ihfA	yiaO	+
rpoD	purB	+
crp	priB	+
rpoD	aroB	+
rpoD	pgpA	+
fnr	cydC	+
rpoS	ddpF	+
rpoN	ygfK	+
fliA	yjcS	+
crp	xylR	+
cueR	moaB	-
modE	hycG	+
rpoD	cynR	+
crp	csgG	+
ihfB	rtcB	+
rpoD	casB	+
fis	dmsA	-
rpoD	tpx	+
rpoN	crl	+
rpoD	cas1	+
rpoN	nikC	+
melR	melR	+-
marA	dctR	-
narL	hybC	-
rpoD	livH	+
arcA	hybE	-
rpoD	ilvE	+
rpoD	pth	+
soxS	ptsG	+
ihfB	glmY	+
nhaR	pgaB	+
rpoD	glnQ	+
flhC	flgN	+
flhC	flgH	+
crp	mazF	+
gcvA	gcvH	+-
arcA	sucD	+-
rpoD	gatA	+
arcA	rplV	-
rpoN	gltL	+
ihfB	acs	-
leuO	casD	+
rcsB	ygiZ	+
crp	pdhR	+
rpoD	ssuA	+
rhaS	rhaR	+?
crp	sucD	+
nsrR	rplT	-
metR	hmp	+
lrp	rrfB	-
fnr	puuP	-
oxyR	flu	-
rpoD	nrdA	+
murR	murP	-
malT	malZ	+
rpoH	trmA	+
rpoD	frc	+
cysB	hslJ	-
rpoD	symE	+
crp	glnL	+-
rpoS	yqiG	+
rcsA	sra	+
narL	narH	+
trpR	aroH	-
rpoE	yiaL	+
cpxR	csgE	-
crp	mcaS	+
fur	gspF	-
paaX	paaC	-
rpoD	pck	+
rpoD	murC	+
rpoD	rpoE	+
rpoS	yciE	+
hns	lrp	-
fnr	ydeJ	+
crp	araJ	+-
crp	citC	-
narL	nuoC	+
crp	lacZ	+-
rstA	narG	+
cra	cyoE	-
fis	ileT	+
rpoD	recB	+
nsrR	nrfD	-
lsrR	lsrK	-
crp	rimP	-
fhlA	fdhF	+
hyfR	hyfJ	+
sdiA	ydiV	+
ihfA	pstS	+
modE	moaB	+
rpoD	phnH	+
rcdA	bluF	+
narL	citX	-
ihfA	paaB	+
rpoD	fliF	+
phoP	ygiC	+
cysB	ygeH	+
lexA	yebG	-
rpoE	lyxK	+
crp	spf	-
dpiA	citC	+
rpoD	uraA	+
exuR	uxuA	-
rpoN	hypF	+
ulaR	ulaG	-
gadX	mdtF	+
crp	hflX	-
lexA	ftsW	-
fucR	fucK	+
rpoS	araH	+
arcA	hyaB	+
fadR	fadD	-
rpoN	potH	+
gutM	srlE	+
modE	modB	-
narL	fdnI	+
hns	relA	+
arcA	ptsG	-
fis	rrfG	+
rpoH	yibA	+
rpoD	sufE	+
flhC	nrfE	+
rpoD	narI	+
cra	pdhR	-
rpoS	bolA	+
rutR	gadW	-
dpiA	dpiA	+
rpoD	cyoB	+
rpoD	ubiC	+
rpoD	agaI	+
rpoD	waaU	+
ihfA	gcd	+
lrp	fimE	+
rpoD	cysC	+
rpoD	alaU	+
fur	entC	-
nhaR	nhaR	+?
crp	ptsI	+-
rpoD	napF	+
rcsB	wza	+
argP	yfaE	+
crp	metK	-
rpoD	yhjA	+
hupB	galE	-
sgrR	sgrT	+
rpoS	ygiB	+
fis	malG	+
fis	nanE	-
rpoD	mdtE	+
fnr	nuoG	-
kdpE	kdpC	+
rpoH	yjhG	+
rpoS	csgB	+
xapR	xapB	+
crp	fixX	+
rpoD	atpE	+
rpoD	dapD	+
appY	appX	+
rpoS	gadC	+
fliA	fliJ	+
glpR	glpQ	-
rcdA	yagK	-
flhC	fliL	+
rpoD	ssrS	+
rpoD	yjjZ	+
fnr	dmsD	+
torR	hdeA	+
gadX	yhiD	+-
rpoH	yccE	+
crp	infB	-
rpoD	dinJ	+
rpoD	add	+
rpoD	metV	+
fliA	modA	+
cysB	yoaC	+
rpoD	lolA	+
hns	chiA	-
rpoN	rutE	+
fnr	ssuE	+
iscR	sufS	+
rpoD	carB	+
rpoD	dapE	+
rpoH	yjiT	+
rpoN	glnA	+
purR	guaB	-
evgA	gadE	+
narP	nrfG	+
rpoH	rrfG	+
rpoD	cytR	+
sgrR	setA	+
rpoD	paaY	+
rpoD	ileU	+
fliA	flxA	+
rpoD	yjbF	+
phoP	glgC	+
lexA	yafN	-
mraZ	ftsI	-
fnr	focA	+
chbR	chbC	+-
rpoD	araG	+
rpoD	entA	+
narL	ccmD	-
lrp	livG	-
narP	hyaF	-
fnr	rpsJ	+
rpoE	rzpD	+
gadE	hdeD	+
ihfB	glcA	+
rpoD	glpF	+
fnr	norV	-
galR	galT	+-
nsrR	hycH	-
fis	glnX	+
rpoD	gabD	+
flhC	fliM	+
crp	glpR	+
phoB	ugpE	+-
dnaA	polA	+
flhC	ccmG	+
ihfA	yiaJ	-
cpxR	rpoE	-
argR	rbfA	-
fliZ	csgE	-
rcsB	molR_1	+
rpoD	hemH	+
fis	leuT	+
ihfB	pstB	+
rpoD	tbpA	+
rpoD	fdx	+
sutR	cysE	-
soxS	fldA	+
iscR	iscS	-
rpoD	fixB	+
lexA	umuC	-
rpoD	gspC	+
rpoS	luxS	+
fis	nrfC	-
ihfA	fnr	+
crp	rpoS	?
nagC	chbC	-
torR	tnaA	+
crp	mdh	+
lrp	ilvM	-
fis	alaT	+
phoP	fadL	+
dcuR	frdD	+
rpoD	glyW	+
phoP	rutE	+
ihfB	aceA	+
rpoD	lrp	+
hipA	relA	-
phoP	purH	+
pdhR	glcD	-
idnR	idnO	+
rpoD	ubiG	+
fhlA	hyfI	+
modE	oppF	-
rpoD	clpP	+
crp	cyaA	-
rpoD	hybC	+
ihfB	yjbF	+
rpoD	prlF	+
narP	ydhV	-
rpoD	mntS	+
rpoD	phnG	+
ihfA	yiaN	+
ihfA	folA	+
rpoE	rsmA	+
rpoN	rhaD	+
rpoD	purC	+
rpoE	sgbH	+
fnr	cydB	+-
cra	aceB	+
cueR	moaC	-
modE	hycF	+
ihfB	dps	+
rpoD	glxR	+
crp	csgF	+
rpoD	casC	+
crp	hlyE	+
zraR	zraS	+
mlrA	csgG	+
flhD	mglB	-
rpoD	cas2	+
rpoN	nikB	+
cra	hypF	-
fliA	fliD	+
lrp	ilvG_1	-
rpoS	yhiM	+
narL	citC	-
arcA	hybF	-
hns	srlR	+
rpoD	mlc	+
crp	sfsA	+
soxS	fpr	+
cspA	gyrA	+
ihfA	glcF	+
arsR	arsB	-
flhC	flgI	+
fnr	fhlA	+
rpoS	ftsQ	+
hns	gspA	-
rpoE	hpf	+
dnaA	yfaE	+-
rpoD	ssuB	+
sgrR	thiQ	-
crp	sucC	+
lexA	ftsL	-
lrp	rrfE	-
lrp	csiD	+
rpoD	yeaE	+
murR	murQ	-
fur	fhuF	-
hns	smtA	+
rpoE	yraP	+
marA	fpr	+
nhaR	osmC	+
narL	narI	+
soxS	ompN	+
rpoD	trpE	+
flhC	hypF	+
fliA	hemL	+
narP	hcr	+
rpoD	fucR	+
gadE	gltD	+
fliZ	mlrA	-
narL	nuoB	+
rpoD	nuoC	+
ihfB	ihfA	-
rpoD	recA	+
ihfA	fhlA	+
fur	mntP	+
rpoD	speE	+
ihfB	narI	+
glnG	ddpF	+
csgD	adrA	+
flhD	nrfE	+
modE	moaC	+
soxS	nfsB	+
rpoD	tfaQ	+
rpoD	phnO	+
rpoH	ibpA	+
ihfA	paaC	+
rpoD	trmD	+
hns	rrsH	-
rpoD	fliG	+
rpoD	rpmI	+
crp	hofC	+
fis	hupB	-
hns	mazE	+
rpoD	aroL	+
cpxR	yebE	+
rpoD	aceE	+
leuO	leuA	+
gadX	mdtE	+
fur	sucC	+
rpoD	fkpB	+
rpoD	pdxJ	+
argR	hisJ	-
fis	thrV	+
fadR	fadE	-
arcA	citX	-
rpoN	potI	+
modE	modA	-
rpoD	dcuA	+
narL	fdnH	+
rpoD	mtlD	+
fis	rrfF	+
rpoD	sufD	+
ihfB	hycE	+
crp	entH	+
leuO	bglF	+
flhC	nrfD	+
rpoD	narJ	+
ihfB	dppA	+
crp	yhcH	+
rpoD	alkB	+
torR	yhiD	+
rpoD	rraA	+
rpoD	cyoC	+
rpoD	nrfC	+
yehT	yjiY	+
dnaA	guaB	-
rpoD	kdsA	+
rpoS	envC	+
lrp	fimD	+
rpoD	cysD	+
rpoS	sucA	+
marA	nfo	+
fur	entB	-
narP	fdnI	-
phoP	ompT	+
crp	ptsH	+-
rpoD	napG	+
ihfA	sucC	-
soxS	inaA	+
nanR	yhcH	-
narP	ydhX	-
rpoD	rsd	+
rpoD	yneM	+
rpoD	iscX	+
rpoS	ygiA	+
fis	malF	+
rpoD	glcC	+
fnr	nuoF	-
yiaJ	sgbH	-
kdpE	kdpB	+
rpoS	csgA	+
rpoD	atpB	+
ihfB	tdcE	+
fis	nuoE	+
rpoD	ydfN	+
rpoD	lysU	+
glcC	glcB	+
rpoD	galK	+
rpoE	rseA	+
mraZ	murD	-
fliA	modB	+
pdhR	tomB	-
rpoE	waaL	+
rpoN	rutF	+
ihfA	ibpB	+
rpoD	carA	+
mazF	mazE	-
hns	gspE	-
lrhA	fimE	+
ihfB	carB	+-
narP	hyaA	-
crp	sroD	+
ihfA	gltA	+
rpoH	rrfF	+
rpoD	paaX	+
flhD	ccmG	+
ihfA	norW	+-
rpoD	yjbG	+
rpoD	thrU	+
rpoE	bamB	+
crp	malE	+
phoP	glgB	+
lexA	yafO	-
adiY	gltD	+
rpoD	araF	+
rpoD	entB	+
narL	ccmE	-
phoB	phnO	+
fis	sra	+
crp	nagC	+-
purR	hflD	-
rpoD	yegR	+
nsrR	rybB	-
pgrR	ycjY	-
fnr	norW	-
fur	fepG	-
agaR	agaA	-
hns	hns	-
modE	narL	+
crp	glpQ	+
rpoH	htpX	+
crp	gadE	-
arcA	cydD	+
rpoD	frdA	+
flhC	ccmD	+
fis	leuW	+
ihfB	pstC	+
flhC	mglC	-
cpxR	hha	+
csiR	gabD	-
rpoD	fixC	+
rpoE	lgoR	+
rpoD	gspB	+
mlc	crr	-
arcA	icd	-
fis	adhE	+
fis	nrfB	-
bglJ	yidL	+
rpoD	nupG	+
rpoD	mzrA	+
phoB	phoU	+
nsrR	bdcA	-
pdhR	glcE	-
fur	sdhC	+
fnr	fumC	-
caiF	caiA	+
rpoH	slt	+
cpxR	marA	+
bluR	ariR	-
rpoD	caiD	+
rpoD	lptA	+
rpoD	nanK	+
crp	marR	+
rpoD	istR-1	+
nsrR	tsgA	-
crp	fepA	+
ihfB	yjbG	+
gatR_2	gatY	-
rpoS	patD	+
cra	betI	+
rob	marB	+
rpoD	ryhB	+
narP	ydhW	-
nsrR	ygbA	-
malT	malG	+
rpoE	rybB	+
narL	napG	-
rpoD	ecpA	+
rpoD	trxA	+
rpoS	hchA	+
fis	acs	-
rhaS	rhaA	+
flhC	hydN	+
fnr	cydA	+-
crp	ppdD	+
lldR	lldR	+-
ihfB	atoE	+
flhD	napF	+
hcaR	hcaF	+
cueR	moaD	-
modE	hycE	+
rpoD	phoE	+
rpoD	casD	+
mlrA	csgF	+
rpoD	oxc	+
flhD	mglC	-
creB	talA	+
rpoD	rrfF	+
ihfA	ilvM	+-
nikR	nikD	-
rpoN	amtB	+
arcA	hybG	-
crp	glcC	+
rpoD	dctR	+
fis	narK	-
soxS	acrZ	+
crp	cyaR	+
nhaR	pgaD	+
hns	nirD	-
arsR	arsC	-
flhC	flgJ	+
arcA	sucB	+-
hns	gspB	-
crp	lsrR	+
rpoD	gatC	+
ihfB	nirD	+-
rpoS	dnaN	+
nrdR	nrdH	-
rpoD	ssuC	+
sgrR	thiP	-
narL	hcp	+
crp	sucB	+
ihfB	rpoH	+
rpoD	gltD	+
lrp	rrfD	-
phoB	psiF	+
torR	tnaB	+
csgD	fliY	-
rpoD	phnE_2	+
crp	hofP	+
mqsR	cspD	-
rpoD	rutR	+
rpoE	fusA	+
gntR	idnD	-
rpoD	rbsK	+
hypT	metB	+
rpoD	dadX	+
rpoD	rnd	+
rpoD	malG	+
rpoD	actP	+
phoP	metB	+
crp	araD	+
narL	nuoE	+
rpoD	waaO	+
rpoS	cbpA	+
rpoD	nuoB	+
ihfB	ihfB	-
glnG	yhdX	+
rpoD	ttdA	+
ihfA	adiA	+
fur	glnD	-
cpxR	csgF	-
fur	nohA	-
flhC	napB	+
rpoN	hyfD	+
glnG	glnP	+-
trpR	trpL	-
rpoD	alsC	+
cpxR	efeU_1	-
gutM	gutQ	+
flhD	nrfF	+
modE	moaD	+
rpoD	phnN	+
rpoH	ibpB	+
rpoD	creD	+
iscR	hyaF	-
rpoD	fliH	+
crp	hofB	+
rpoD	pepD	+
oxyR	trxC	+
rpoD	aceB	+
nsrR	sufA	-
rpoN	hypD	+
fnr	glpB	+
fur	sucB	+
rpoD	psiF	+
oxyR	uxuA	-
ihfB	fimF	+
fucR	fucI	+
nac	gdhA	-
fis	serT	+
rpoD	cusB	+
crp	ubiG	+
rpoS	dhaK	+
rpoD	rnlA	+
crp	melA	+
rpoD	sufC	+
ihfB	hycD	+
leuO	bglG	+
flhC	nrfG	+
rpoD	mpl	+
rpoD	narK	+
rpoD	pheA	+
rpoN	yaaU	+
crp	xseA	-
crp	srlA	+
cpxR	psd	-
rpoS	puuB	+
rpoS	ompF	+
rpoD	nrfB	+
fnr	rpsP	-
ihfA	dppA	+
rpoD	waaS	+
fur	gspG	-
flhC	ycgR	+
rpoD	alaW	+
narP	fdnH	-
hipB	hipA	-
rpoD	napD	+
ihfA	sucB	-
ihfA	nrfF	+-
crp	fucO	+
rpoD	bglX	+
fis	ptsG	+-
rpoD	mioC	+
sgrR	sgrR	-
fis	nanK	-
rpoD	glcB	+
ihfA	actP	-
arcA	treB	+
fnr	nuoA	-
nsrR	yoaG	-
rpoD	atpC	+
ihfB	tdcF	+
ihfA	rtcB	+
fliA	fliL	+
glnG	hisJ	+
fis	msrA	-
rpoD	rpsR	+
crp	nanE	+
glcC	glcE	+
sgrR	sroA	-
rpoD	marB	+
rpoE	rseB	+
phoP	rutF	+
rpoD	shiA	+
gadE	mdtE	+
rpoD	garL	+
yafQ	dinJ	-
fliA	modC	+
cpxR	yccA	+
rpoN	rutG	+
fnr	tdcB	+
mhpR	mhpA	+
iscR	napH	-
rpoD	argB	+
rpoD	ugpA	+
rpoN	prpC	+
csgD	yccT	+
ihfB	carA	+-
fur	fumB	+
marA	pqiB	+
mntR	dps	-
phoB	cusR	+
rpoH	rrfE	+
crp	epd	+
ihfB	sufC	+
rpoS	znuA	+
flhD	ccmF	+
rpoS	ymgC	+
ihfA	norV	+-
ihfA	focA	+
flhD	ycgR	+
crp	malF	+
crp	ampD	-
fur	ndh	-
phoP	glgA	+
ihfB	aceK	+
rpoD	araE	+
rpoD	entC	+
narL	ccmB	-
phoB	phnN	+
hupA	seqA	-
rpoE	yfgD	+
gadE	cyoB	+
arcA	lpd	-
evgA	safA	+
fnr	dppF	-
galR	galR	-
ihfB	ilvD	+-
ihfB	cysH	+
agaR	agaB	-
lexA	dinG	-
pdhR	ftsA	-
arcA	cydC	+
acrR	micF	-
purR	gcvH	-
rpoD	hisF	+
flhC	ccmE	+
fis	leuV	+
crp	ycdZ	+-
flhC	mglB	-
fnr	gadW	-
xylR	xylA	+
cpxR	rprA	+
iscR	iscU	-
rpoD	mglC	+
basR	cspI	+
rpoD	gspA	+
nac	codA	+
hns	asr	-
hns	yhiM	-
rpoS	gpmM	+
rob	ldtB	+
cpxR	mzrA	+
ecpR	flhD	-
phoP	rutG	+
fnr	fixA	+
deoR	nupG	-
ihfB	tdcB	+
phoP	treR	-
fur	sdhB	+
fnr	fumB	+
caiF	caiB	+
cdaR	gudD	+
ihfA	fimF	+
hupB	seqA	-
rpoD	caiE	+
modE	oppD	-
rpoD	nanT	+
fis	tyrT	+
rpoD	hybA	+
gadE	gadY	+
nsrR	norR	-
rpoD	purA	+
rob	ybjC	+
rpoD	torA	+
gadE	osmB	+
rpoD	serX	+
rpoD	uhpT	+
ihfB	atoD	+
rpoS	ddpA	+
mraZ	ftsA	-
cueR	moaE	-
modE	hycD	+
soxS	tolC	+
rpoD	thiL	+
ihfB	rtcA	+
soxS	pqiA	+
rpoD	casE	+
nsrR	ydbD	-
crp	nanA	+
mlrA	csgE	+
narL	moeB	+
tyrR	folA	+
ihfA	ilvL	+-
rpoD	uvrB	+
rpoE	rfaD	+
rpoD	chpS	+
fnr	sucD	-
fur	oppA	-
flhC	flhB	+
nikR	nikE	-
rpoD	modA	+
rpoN	rtcA	+
pgrR	ymjC	-
rpoD	ilvH	+
comR	bhsA	-
galR	mglB	-
crp	tdcD	+
crp	mazE	+
arcA	sucC	+-
hns	gspC	-
rpoD	gatB	+
rpoH	ymjC	+
narP	norV	-
crp	rhaT	+
rpoD	nadE	+
nrdR	nrdI	-
rpoD	ssuD	+
crp	sucA	+
ihfA	nmpC	-
rpoD	sroD	+
lrp	rrfG	-
fis	mazG	+
rpoD	nrdB	+
csgD	fliZ	-
hns	gutQ	+
allR	allA	-
rpoD	yfaE	+
fis	rsmA	+
srlR	gutQ	-
argR	astE	+
rpoD	mtr	+
evgA	frc	+
rpoD	sgbH	+
fnr	gltF	-
rpoD	trpC	+
rpoS	mutS	+
rpoD	rne	+
rpoD	malF	+
mraZ	lpxC	-
fis	glcC	-
nsrR	rffA	-
rpoD	fucP	+
crp	araE	+
rpoD	wzxE	+
rpoD	waaL	+
crp	lacY	+-
narP	napA	+-
rpoN	flhC	+
rpoS	artQ	+
flhC	napC	+
arcA	gatC	-
rpoN	hyfE	+
rpoD	aspA	+
rpoD	alsB	+
flhD	nrfG	+
modE	moaE	+
rpoD	betI	+
rpoD	phnM	+
ihfA	paaA	+
idnR	gntK	-
iscR	hyaE	-
appY	appA	+
rpoD	fliI	+
nadR	pncB	-
marA	acnA	+
fliA	fliS	+
rpoE	lhr	+
rpoD	rrsH	+
rpoD	btuB	+
rpoN	hypE	+
phoB	ydfH	+
fnr	glpC	+
leuO	leuC	+
modE	ccmH	+
rpoD	bcp	+
rpoH	yafU	+
pdhR	murF	-
rpoE	rnlB	+
fur	fecI	-
rpoD	cusC	+
narL	cydD	+
rpoD	flhE	+
rpoD	fdnI	+
crp	glgC	+
rpoD	ilvG_1	+
narL	moeA	+
narL	napD	-
fis	rimP	+
fis	rrfH	+
rpoD	sufB	+
rpoD	rplD	+
ihfB	hycG	+
flhC	nrfF	+
rpoD	narL	+
hns	hchA	-
arcA	lldR	-
rpoH	sdaA	+
ihfB	dppC	+
rpoS	puuC	+
hupA	mtr	-
fis	acnB	-
dpiA	dpiB	+
rpoN	argT	+
rpoD	nrfA	+
fnr	rpsQ	+
rpoD	agaD	+
rpoD	kdsC	+
fur	gspD	-
arcA	ndh	-
rpoD	alaV	+
rpoS	sucC	+
narP	fdnG	-
fnr	sodA	-
cysB	cysB	-
fliA	yhjH	+
nac	feaR	+
rpoN	hisM	+
sgrR	sgrS	+
mlc	manZ	-
rpoD	xapB	+
rpoH	nfuA	+
rpoD	glcE	+
rpoD	ebgA	+
flhD	flgI	+
rpoH	yjhB	+
fnr	cheB	+
nanR	nanA	-
ihfB	tdcG	+
ihfA	rtcA	+
fliA	fliO	+
glpR	glpT	-
rpoD	rpsS	+
glcC	glcD	+
rpoD	artP	+
rpoD	galM	+
rpoD	evgS	+
rpoE	rseC	+
fnr	hypB	+
gadE	mdtF	+
rpoD	dinI	+
purR	purR	-
adiY	gadC	+
fnr	tdcC	+
mhpR	mhpB	+
rpoN	prpB	+
rpoN	glnL	+
fnr	fnr	-
fur	fumC	-
ecpR	ecpR	+
phoB	cusS	+
crp	narQ	-
rpoH	rrfD	+
crp	puuD	-
crp	cytR	+-
ihfB	sufB	+
rpoH	ydhQ	+
flhD	ccmE	+
rpoD	pdhR	+
rpoD	uxuR	+
rpoD	yjbE	+
crp	malG	+
crp	ampE	-
chbR	chbF	+-
rpoD	araD	+
narL	ccmC	-
phoB	phnM	+
gadX	gadW	+-
rpoD	gcvA	+
gadE	cyoC	+
narP	hyaC	-
ihfB	glcB	+
rpoD	appX	+
pdhR	rsmH	-
galR	galS	-
agaR	agaC	-
lexA	dinF	-
rpoD	rdoA	+
ihfA	tdcE	+
arcA	gltA	-
arcA	cydB	+
marA	ybaO	+
rpoD	frdC	+
flhC	ccmB	+
fis	leuQ	+
ihfB	pstA	+
acrR	soxR	-
flhC	mglA	-
xylR	xylB	+
rpoD	azoR	+
nac	gltF	-
soxS	fldB	+
hns	stpA	-
rpoD	fixA	+
phoP	mgtA	+
cysB	yfbR	+
crp	rbsD	+
rpoD	safA	+
flhC	glpB	+
pdhR	ftsZ	-
nagC	chbF	-
lrp	ilvH	+-
rpoD	glyT	+
fnr	fixB	+
rpoH	tyrR	+
acrR	marR	-
gadX	ybaT	+
caiF	caiC	+
ihfA	fimG	+
oxyR	gor	+
rpoD	lptC	+
rpoD	hpf	+
fliA	motA	+
rpoD	hybF	+
hns	galK	-
ihfB	yjbE	+
rpoS	ansP	+
rpoH	yggW	+
gadE	gadX	+-
rcdA	ydeI	+
rpoD	fucK	+
rpoD	sohB	+
gadE	osmC	+
rpoD	ftsZ	+
rpoD	thrL	+
lldR	lldP	+-
flhD	fliZ	+
rpoS	ddpB	+
cra	aceA	+
arcA	iraM	+
hcaR	hcaD	+
fnr	fepE	+
arcA	puuE	-
prpR	prpR	-
mprA	acrB	-
mlrA	csgD	+
flhD	mglA	-
oxyR	rimK	-
rpoD	rrfD	+
rpoN	aslB	+
hns	micF	-
rpoD	uvrC	+
rpoD	gutQ	+
dicA	ydfX	-
fnr	cyoE	-
rpoN	rtcB	+
crp	rpsR	+
rpoD	ilvI	+
rpoD	acnB	+
rpoS	ariR	+
ihfB	amiA	-
galR	mglC	-
gadX	asnB	+
rpoD	cspC	+
narP	norW	-
rpoD	nadB	+
nrdR	nrdF	-
rpoH	yrfG	+
rpoD	cspA	+
lrp	rrfF	-
fis	mazF	+
allR	allB	-
rpoN	puuP	+
nadR	nadA	-
purR	pyrC	-
argR	astB	+
rpoH	nusB	+
crp	feaB	+
ihfA	ulaD	-
fliA	fliG	+
crp	prpB	+
rpoD	fimI	+
trpR	aroL	-
ihfA	ompR	-
rpoD	trpB	+
nsrR	dsdC	-
rpoD	rnb	+
rpoH	osmF	+
rpoD	rrfH	+
rpoD	malE	+
rpoD	rpoA	+
lacI	lacA	-
ihfB	csgF	+
crp	araF	+
narL	nuoG	+
ompR	ompC	+
rpoD	fadR	+
narP	napB	+-
rpoS	artP	+
fnr	grcA	+-
gadE	gnd	+
arcA	rpsC	-
hns	gabD	+
arcA	gatB	-
ihfA	glcD	+
rpoN	hyfF	+
trpR	trpB	-
rpoD	alsA	+
rpoD	csrA	+
marA	slp	-
argR	astD	+
soxS	nfsA	+
rpoD	phnL	+
rpoD	tatA	+
hns	fes	+
ihfA	paaF	+
rpoD	acs	+
rpoS	yehX	+
iscR	hyaD	-
rpoD	yhdT	+
fliA	fliR	+
fis	hupA	+
rpoD	infB	+
phoP	mgrR	+
lrp	avtA	-
crp	gyrA	+
nsrR	sufC	-
leuO	leuB	+
rpoD	amiA	+
pdhR	murG	-
fucR	fucO	+
ihfA	dmsA	-
rpoD	flhD	+
gutM	srlA	+
rpoD	bluF	+
rpoD	dcuB	+
rpoD	ilvG_2	+
arcA	betA	-
[truncated: 4,789 more rows]

## Sheet: Bsubt-TRN
TF	TG	RegType
BSU23450	BSU22900	+
BSU16170	BSU13000	-
BSU25200	BSU14510	+
BSU00980	BSU38090	+
BSU16170	BSU16200	-
BSU24220	BSU29200	+
BSU35230	BSU16250	+
BSU25200	BSU15920	+
BSU26350	BSU26320	-
BSU25200	BSU15320	+
BSU29740	BSU35030	-
BSU25200	BSU00980	+
BSU25200	BSU00040	+
BSU15320	BSU13710	+
BSU16170	BSU24090	-
BSU31070	BSU31050	-
BSU25200	BSU15600	+
BSU26350	BSU26310	-
BSU11500	BSU38110	+
BSU25200	BSU33100	+
BSU25200	BSU36500	+
BSU09380	BSU14150	-
BSU00560	BSU33050	-
BSU01730	BSU00630	+
BSU36420	BSU22800	-
BSU15320	BSU38970	+
BSU17850	BSU35170	-
BSU33221	BSU38500	+
BSU00370	BSU34320	-
BSU16170	BSU10300	-
BSU23450	BSU00830	+
BSU16470	BSU31250	+
BSU16470	BSU00610	+
BSU23120	BSU03300	+
BSU14240	BSU40600	-
BSU16170	BSU37700	-
BSU04730	BSU25290	+
BSU15330	BSU15330	+
BSU00370	BSU21550	-
BSU35230	BSU16300	+
BSU25200	BSU39740	+
BSU10420	BSU14020	-
BSU33520	BSU19920	-
BSU25200	BSU00370	+
BSU15320	BSU00610	+
BSU09990	BSU11390	-
BSU25200	BSU06460	+
BSU25200	BSU15500	+
BSU27120	BSU27150	+
BSU00370	BSU17240	-
BSU09520	BSU00630	+
BSU00370	BSU05100	-
BSU17590	BSU17570	-
BSU29740	BSU35930	-
BSU25760	BSU18670	+
BSU29740	BSU30300	-
BSU03750	BSU03730	+
BSU00370	BSU35960	+
BSU25200	BSU23500	+
BSU29740	BSU30290	-
BSU13880	BSU13900	+
BSU15330	BSU18720	+
BSU38070	BSU38040	+
BSU04730	BSU38620	+
BSU25200	BSU28040	+
BSU16470	BSU19760	+
BSU14480	BSU02780	-
BSU04820	BSU04860	-
BSU09520	BSU38480	+
BSU24100	BSU24050	+
BSU31070	BSU33710	-
BSU25200	BSU06830	+
BSU24220	BSU23470	+
BSU24220	BSU37030	+
BSU29740	BSU38730	-
BSU00370	BSU23470	-
BSU25200	BSU35220	+
BSU25200	BSU31910	+
BSU00370	BSU36230	-
BSU36420	BSU25070	-
BSU25200	BSU39230	+
BSU27080	BSU27070	+
BSU32420	BSU32430	+-
BSU00470	BSU06460	-
BSU25200	BSU25840	+
BSU22120	BSU22130	-
BSU25200	BSU11210	+
BSU13310	BSU11370	+
BSU26350	BSU26330	-
BSU29740	BSU28270	+
BSU16170	BSU24050	-
BSU14240	BSU21470	-
BSU16170	BSU28250	-
BSU16470	BSU26210	+
BSU13310	BSU32080	-
BSU27120	BSU33580	+
BSU23100	BSU11490	+
BSU29740	BSU22110	-
BSU18420	BSU14860	+
BSU25200	BSU40900	+
BSU25200	BSU40040	+
BSU25200	BSU12920	+
BSU25200	BSU35910	+
BSU07010	BSU07040	+
BSU14240	BSU39950	-
BSU25760	BSU10690	+
BSU34200	BSU27070	+
BSU07010	BSU07070	+
BSU15320	BSU36410	+
BSU25200	BSU33920	+
BSU16470	BSU16060	+
BSU35490	BSU38400	+
BSU02450	BSU02420	+
BSU24610	BSU40310	-
BSU25100	BSU03359	-
BSU15330	BSU08650	+
BSU25200	BSU19820	+
BSU16170	BSU32740	+
BSU17850	BSU06600	-
BSU29740	BSU38970	-
BSU25200	BSU09410	+
BSU23120	BSU17370	+
BSU27120	BSU27120	+
BSU04730	BSU24760	+
BSU25200	BSU28740	+
BSU25760	BSU10930	+
BSU25200	BSU37360	+
BSU25760	BSU10910	+
BSU10420	BSU16110	+
BSU23520	BSU03310	-
BSU15470	BSU15530	+-
BSU28410	BSU10720	-
BSU25200	BSU07390	+
BSU16470	BSU38400	+
BSU32870	BSU32880	-
BSU00010	BSU40230	-
BSU35490	BSU34470	+
BSU13450	BSU13450	+
BSU00370	BSU05840	+
BSU25200	BSU15720	+
BSU35490	BSU34450	+
BSU15670	BSU33710	+
BSU24220	BSU25880	+
BSU13310	BSU32260	-
BSU23100	BSU23090	+
BSU25200	BSU03000	+
BSU25200	BSU34810	+
BSU28410	BSU26390	-
BSU25200	BSU34250	+
BSU25200	BSU36900	+
BSU05970	BSU36010	-
BSU25760	BSU40530	+
BSU36420	BSU40530	+
BSU33970	BSU28810	-
BSU01730	BSU36090	+
BSU12560	BSU12610	+
BSU40410	BSU15280	+
BSU25200	BSU34460	+
BSU29110	BSU35710	-
BSU00980	BSU18910	+
BSU16170	BSU32610	-
BSU29740	BSU14900	-
BSU27120	BSU24160	+
BSU14140	BSU29120	-
BSU00370	BSU21480	-
BSU10420	BSU24720	+
BSU25200	BSU28190	+
BSU25200	BSU39420	+
BSU25200	BSU33490	+
BSU24610	BSU15330	-
BSU04730	BSU07780	+
BSU15320	BSU24370	+
BSU24220	BSU23460	+
BSU23120	BSU14170	+
BSU15320	BSU19850	+
BSU16470	BSU11950	+
BSU28410	BSU37900	+
BSU39340	BSU39350	+
BSU35490	BSU16310	U-
BSU14240	BSU40180	-
BSU23450	BSU08510	+
BSU00370	BSU18340	-
BSU00370	BSU06830	-
BSU09520	BSU18180	+
BSU01730	BSU00250	+
BSU08730	BSU28130	-
BSU23520	BSU31980	-
BSU15670	BSU34350	+
BSU15330	BSU13920	+
BSU16170	BSU12990	-
BSU16470	BSU38540	+
BSU33520	BSU19860	-
BSU15330	BSU22920	+
BSU15330	BSU22000	+
BSU16470	BSU38110	+
BSU25200	BSU23100	+
BSU25200	BSU12020	+
BSU00370	BSU40150	-
BSU05970	BSU38750	-
BSU04730	BSU04180	+
BSU17850	BSU23710	-
BSU36420	BSU06920	+
BSU25760	BSU11770	+
BSU35490	BSU16440	U-
BSU08730	BSU03480	+
BSU15320	BSU24160	+
BSU15330	BSU03930	+
BSU16470	BSU16410	+
BSU16170	BSU12970	-
BSU28410	BSU07280	+
BSU29740	BSU28460	U
BSU15330	BSU32859	+
BSU37620	BSU37620	-
BSU01730	BSU08580	+
BSU40410	BSU35740	+
BSU25200	BSU29390	+
BSU25200	BSU01170	+
BSU25760	BSU25150	+
BSU00010	BSU21440	-
BSU04730	BSU02910	+
BSU04730	BSU09450	+
BSU25200	BSU01270	+
BSU16170	BSU32080	-
BSU35490	BSU35370	+
BSU25760	BSU10900	+
BSU25200	BSU37150	+
BSU25200	BSU15940	+
BSU25200	BSU05870	+
BSU09990	BSU35420	-
BSU40050	BSU40060	-
BSU23520	BSU37230	-
BSU25200	BSU37410	+
BSU23120	BSU14160	+
BSU16170	BSU16430	-
BSU39770	BSU39770	-
BSU23450	BSU25530	+
BSU00010	BSU40590	-
BSU00370	BSU26890	-
BSU38450	BSU38450	-
BSU25200	BSU39080	+
BSU25200	BSU22110	+
BSU25200	BSU17940	+
BSU09520	BSU00610	+
BSU23120	BSU22560	+
BSU04730	BSU33530	+
BSU15320	BSU15210	+
BSU31210	BSU31220	-
BSU14020	BSU14170	-
BSU25200	BSU05470	+
BSU23520	BSU03800	-
BSU15320	BSU10940	+
BSU23120	BSU13360	+
BSU23120	BSU38130	-
BSU04730	BSU35970	+
BSU25200	BSU28450	+
BSU09520	BSU15260	+
BSU29110	BSU02130	+
BSU16170	BSU16280	-
BSU25200	BSU30410	+
BSU15320	BSU32910	+
BSU25200	BSU16760	+
BSU24220	BSU16310	-
BSU35230	BSU16440	+
BSU23120	BSU14910	+
BSU01730	BSU11500	+
BSU25200	BSU40920	+
BSU25760	BSU11320	+
BSU25200	BSU00670	+
BSU25760	BSU19490	+
BSU29740	BSU04740	-
BSU04730	BSU37220	+
BSU27520	BSU29330	-
BSU35490	BSU16460	U-
BSU25200	BSU12930	+
BSU13480	BSU13490	-
BSU25200	BSU27990	+
BSU24610	BSU34350	-
BSU24220	BSU15310	+
BSU00370	BSU13980	-
BSU23450	BSU18030	+
BSU00370	BSU14880	-
BSU29110	BSU03510	+
BSU23450	BSU03400	+
BSU29740	BSU24140	-
BSU28410	BSU17310	+
BSU25200	BSU01820	+
BSU15330	BSU18020	+
BSU04730	BSU33850	+
BSU23520	BSU03290	-
BSU25200	BSU00930	+
BSU15320	BSU22520	+
BSU25200	BSU37740	+
BSU00370	BSU37430	-
BSU40410	BSU14460	+
BSU25200	BSU02540	+
BSU14480	BSU03490	-
BSU15320	BSU25520	+
BSU16170	BSU15340	-
BSU24220	BSU16230	-
BSU00010	BSU40600	-
BSU29740	BSU14100	-
BSU25200	BSU22450	+
BSU28550	BSU14060	-
BSU23120	BSU03760	+
BSU23120	BSU22540	+
BSU38420	BSU34460	+
BSU16170	BSU16170	-
BSU09520	BSU15230	+
BSU25200	BSU03960	+
BSU26720	BSU26680	-
BSU25200	BSU10300	+
BSU15320	BSU27310	+
BSU22440	BSU10360	-
BSU00370	BSU19170	-
BSU24220	BSU16340	-
BSU16170	BSU40340	-
BSU15320	BSU19700	+
BSU25200	BSU01390	+
BSU25200	BSU26600	+
BSU25250	BSU14629	-
BSU29740	BSU12350	-
BSU25200	BSU07880	+
BSU08190	BSU08200	+
BSU25760	BSU37850	+
BSU25200	BSU35700	+
BSU25200	BSU37370	+
BSU25200	BSU34265	+
BSU23120	BSU03320	+
BSU24220	BSU35520	-
BSU09990	BSU35410	-
BSU14730	BSU14740	+
BSU33222	BSU33240	+
BSU17850	BSU17260	-
BSU04730	BSU04720	+
BSU33520	BSU19930	-
BSU25200	BSU17390	+
BSU38310	BSU38320	+
BSU25200	BSU03220	+
BSU22770	BSU22600	+-
BSU28410	BSU07310	+
BSU04730	BSU30640	+
BSU25200	BSU34820	+
BSU28410	BSU13789	+
BSU27520	BSU39510	-
BSU25200	BSU34150	+
BSU33221	BSU33222	+
BSU10560	BSU10540	-
BSU15320	BSU11790	+
BSU33520	BSU33500	-
BSU00370	BSU33760	-
BSU13310	BSU32460	+
BSU13450	BSU14460	+
BSU25760	BSU13789	+
BSU34180	BSU34030	-
BSU00370	BSU01910	-
BSU04730	BSU07850	+
BSU31070	BSU31060	-
BSU27520	BSU07200	-
BSU25200	BSU26340	+
BSU00370	BSU09890	-
BSU29740	BSU39690	-
BSU00370	BSU17190	-
BSU25200	BSU04670	+
BSU17850	BSU38090	-
BSU15330	BSU25530	+
BSU23450	BSU35590	+
BSU23450	BSU00670	+
BSU15320	BSU11310	+
BSU34380	BSU35630	-
BSU25760	BSU31270	+
BSU27120	BSU24170	+
BSU15320	BSU31280	+
BSU37310	BSU08060	+
BSU22770	BSU22620	+-
BSU15330	BSU35800	+
BSU25760	BSU17670	+
BSU16170	BSU21770	-
BSU16170	BSU32590	-
BSU03890	BSU03890	-
BSU25200	BSU37170	+
BSU15330	BSU07770	+
BSU00370	BSU31250	-
BSU15330	BSU13390	+
BSU25200	BSU37380	+
BSU23100	BSU00570	+
BSU10420	BSU35390	+
BSU16600	BSU16610	-
BSU27120	BSU28020	+
BSU28410	BSU06850	+
BSU25200	BSU28130	+
BSU28410	BSU36060	-
BSU27520	BSU29400	-
BSU29740	BSU22130	-
BSU25760	BSU19970	+
BSU29740	BSU28710	-
BSU01730	BSU38280	+
BSU25200	BSU25230	+
BSU23450	BSU38630	+
BSU15320	BSU17420	+
BSU29740	BSU35020	-
BSU29740	BSU38770	-
BSU25200	BSU28430	+
BSU04730	BSU04670	+
BSU38420	BSU34450	+
BSU04730	BSU28830	+
BSU29740	BSU15100	-
BSU25200	BSU31980	+
BSU25490	BSU25460	-
BSU25490	BSU25470	-
BSU25200	BSU01160	+
BSU25200	BSU01620	+
BSU25490	BSU25480	-
BSU25200	BSU35640	+
BSU10420	BSU25570	+
BSU19540	BSU08240	-
BSU27520	BSU39520	-
BSU25760	BSU37860	+
BSU17850	BSU27740	-
BSU25200	BSU16440	+
BSU25200	BSU16590	+
BSU23450	BSU25800	+
BSU17850	BSU05650	-
BSU25200	BSU35470	+
BSU33790	BSU32820	+
BSU22770	BSU22650	+-
BSU29740	BSU28780	-
BSU23450	BSU00660	+
BSU36420	BSU36060	+
BSU15330	BSU08550	+
BSU37310	BSU37250	+
BSU15320	BSU30950	+
BSU13310	BSU04110	+
BSU25200	BSU08860	+
BSU13310	BSU04080	+
BSU29740	BSU22550	-
BSU12560	BSU12580	+
BSU28410	BSU10900	-
BSU00370	BSU40180	-
BSU16170	BSU03510	-
BSU00680	BSU00670	+
BSU04730	BSU23330	+
BSU15320	BSU06290	+
BSU00010	BSU41010	-
BSU27120	BSU31279	+
BSU24220	BSU24220	-
BSU10420	BSU35440	+
BSU15330	BSU27750	+
BSU04730	BSU27760	+
BSU25200	BSU28300	+
BSU25200	BSU02430	+
BSU38700	BSU38700	+
BSU40410	BSU39220	-
BSU15330	BSU33070	+
BSU01730	BSU38250	+
BSU25200	BSU35300	+
BSU24610	BSU09370	-
BSU25200	BSU40050	+
BSU25200	BSU25430	+
BSU15090	BSU11740	+
BSU15330	BSU19430	+
BSU27520	BSU15600	-
BSU23450	BSU29510	+
BSU15330	BSU00560	+
BSU30460	BSU36480	-
BSU25760	BSU17030	+
BSU15320	BSU25070	+
BSU24220	BSU10750	+
BSU15320	BSU15810	+
BSU27120	BSU05550	+
BSU25200	BSU24700	+
BSU16470	BSU16070	+
BSU40050	BSU40050	-
BSU25200	BSU22019	+
BSU00370	BSU37380	-
BSU29740	BSU08060	-
BSU16170	BSU12430	-
BSU16170	BSU38090	-
BSU15330	BSU23470	+
BSU29110	BSU09410	+
BSU23520	BSU18440	U
BSU24610	BSU34290	-
BSU33970	BSU28770	-
BSU04730	BSU35670	+
BSU00980	BSU29780	+
BSU15670	BSU02990	+
BSU35490	BSU31860	+
BSU00370	BSU37790	-
BSU25200	BSU18470	+
BSU00370	BSU39890	-
BSU00980	BSU40310	+
BSU25200	BSU13150	+
BSU29110	BSU11990	+
BSU25200	BSU29350	+
BSU25200	BSU03200	+
BSU05850	BSU05880	-
BSU14480	BSU14880	-
BSU29740	BSU22090	-
BSU27520	BSU00730	-
BSU25200	BSU24600	+
BSU25200	BSU03520	+
BSU25200	BSU41030	+
BSU24220	BSU12430	-
BSU15320	BSU19900	+
BSU29400	BSU29370	+
BSU04730	BSU07930	+
BSU29740	BSU33960	-
BSU04730	BSU12220	+
BSU15320	BSU19730	+
BSU01050	BSU01040	-
BSU25200	BSU35710	+
BSU29740	BSU32820	-
BSU04730	BSU00840	+
BSU25200	BSU29840	+
BSU33221	BSU35640	-
BSU17850	BSU18950	-
BSU35490	BSU39230	-
BSU29740	BSU12440	-
BSU15320	BSU18239	+
BSU00370	BSU22540	-
BSU00980	BSU03770	+
BSU31070	BSU33720	-
BSU16170	BSU39380	-
BSU35490	BSU16320	U-
BSU25200	BSU11880	+
BSU22120	BSU22140	-
BSU03750	BSU03740	+
BSU23120	BSU14880	+
BSU25200	BSU24220	+
BSU22120	BSU22120	-
BSU32420	BSU32500	+
BSU25200	BSU15570	+
BSU23120	BSU13040	+
BSU15320	BSU15240	+
BSU25200	BSU01080	+
BSU25200	BSU01150	+
BSU33080	BSU33100	+
BSU36420	BSU15200	-
BSU23120	BSU23130	+
BSU29740	BSU04670	-
BSU25200	BSU16350	+
BSU40540	BSU40540	+
BSU25200	BSU16380	+
BSU29740	BSU28250	+
BSU27120	BSU27160	+
BSU25200	BSU16450	+
BSU01730	BSU11340	+
BSU25200	BSU35230	+
BSU25200	BSU12010	+
BSU29740	BSU34150	-
BSU25200	BSU17460	+
BSU25200	BSU27920	+
BSU25200	BSU17950	+
BSU32420	BSU32420	-
BSU35490	BSU16450	U-
BSU29740	BSU02140	-
BSU00370	BSU14910	-
BSU35490	BSU35460	+
BSU33520	BSU33510	-
BSU24770	BSU24770	+
BSU25200	BSU11240	+
BSU01730	BSU04590	+
BSU23450	BSU08310	+
BSU00370	BSU34310	-
BSU28410	BSU19780	+
BSU16170	BSU24080	-
BSU15670	BSU34320	+
BSU25200	BSU31700	+
BSU36420	BSU12090	+
BSU23520	BSU33320	-
BSU29110	BSU35760	-
BSU25200	BSU32470	+
BSU00680	BSU00690	+
BSU16470	BSU16360	+
BSU15670	BSU33810	+
BSU23450	BSU23480	+
BSU25200	BSU36510	+
BSU36420	BSU25350	-
BSU28550	BSU32830	-
BSU33660	BSU40300	-
BSU15320	BSU00230	+
BSU16600	BSU16650	-
BSU38600	BSU38560	+
BSU09700	BSU09720	-
BSU35230	BSU16400	+
BSU15320	BSU14870	+
BSU24610	BSU14240	-
BSU04730	BSU13020	+
BSU24220	BSU40320	-
BSU08730	BSU23520	-
BSU04730	BSU11120	+
BSU27520	BSU29360	-
BSU23520	BSU07510	-
BSU15330	BSU09180	+
BSU29110	BSU01980	+
BSU25200	BSU36660	+
BSU04730	BSU08580	+
BSU25200	BSU34320	+
BSU33221	BSU21460	+
BSU25200	BSU09840	+
BSU16170	BSU29670	-
BSU24220	BSU00020	-
BSU25200	BSU02680	+
BSU00470	BSU00480	-
BSU29110	BSU02640	+
BSU36420	BSU17420	+
BSU00470	BSU24320	-
BSU05850	BSU05860	-
BSU15320	BSU17640	+
BSU28920	BSU28910	+
BSU15330	BSU07980	+
BSU32420	BSU13170	+
BSU17850	BSU06070	-
BSU28410	BSU12090	-
BSU04730	BSU12160	+
BSU09520	BSU03250	+
BSU01730	BSU02910	+
BSU25200	BSU22470	+
BSU15320	BSU24150	+
BSU25200	BSU15240	+
BSU25200	BSU39330	+
BSU29740	BSU18960	-
BSU35490	BSU16290	U-
BSU15320	BSU15030	+
BSU35490	BSU15300	+
BSU28410	BSU15950	+
BSU15330	BSU08660	+
BSU33221	BSU38520	+
BSU15320	BSU31730	+
BSU25200	BSU24720	+
BSU24220	BSU14130	+
BSU12000	BSU12000	+
BSU04730	BSU04190	+
BSU15320	BSU01520	+
BSU00370	BSU34290	-
BSU01730	BSU00270	+
BSU23450	BSU23470	+
BSU33840	BSU33810	-
BSU25200	BSU37490	+
BSU25200	BSU35410	+
BSU25200	BSU00830	+
BSU14480	BSU14890	-
BSU25200	BSU08630	+
BSU16470	BSU16330	+
BSU04730	BSU31280	+
BSU13310	BSU36640	+
BSU39660	BSU39630	+
BSU23520	BSU04530	-
BSU23450	BSU00690	+
BSU14730	BSU14730	+
BSU34200	BSU40340	+
BSU08730	BSU13850	-
BSU25760	BSU11740	+
BSU25760	BSU36040	+
BSU32420	BSU32450	+-
BSU02450	BSU02430	+
BSU15320	BSU05710	+
BSU25200	BSU31550	+
BSU00370	BSU38790	-
BSU04730	BSU02110	+
BSU18420	BSU14850	+
BSU09520	BSU27650	+
BSU13310	BSU11460	+
BSU25200	BSU23520	+
BSU25200	BSU32530	+
BSU17850	BSU09910	-
BSU25760	BSU10940	+
BSU29110	BSU01920	+
BSU39990	BSU39970	-
BSU23450	BSU15310	+
BSU23100	BSU14480	+
BSU15330	BSU08110	+
BSU25200	BSU16210	+
BSU33970	BSU28790	-
BSU16170	BSU16310	-
BSU04730	BSU04290	+
BSU25200	BSU00740	+
BSU16170	BSU16190	-
BSU23450	BSU33060	+
BSU25200	BSU12310	+
BSU25200	BSU25490	+
BSU01730	BSU14370	+
BSU29740	BSU08090	-
BSU25760	BSU30850	+
BSU25200	BSU31930	+
BSU25200	BSU13120	+
BSU23520	BSU31960	-
BSU25200	BSU39250	+
BSU37310	BSU08080	+
BSU25200	BSU15290	+
BSU13310	BSU07560	-
BSU29740	BSU23560	-
BSU25200	BSU03480	+
BSU25760	BSU25710	+
BSU25200	BSU24630	+
BSU36420	BSU11760	+
BSU00370	BSU33270	-
BSU00370	BSU05810	+
BSU25200	BSU32440	+
BSU38600	BSU38580	+
BSU24220	BSU29210	+
BSU29740	BSU28720	-
BSU02500	BSU02490	-
BSU28410	BSU36050	-
BSU09700	BSU09700	-
BSU08730	BSU03510	+
BSU16170	BSU37760	-
BSU07820	BSU07800	-
BSU01730	BSU34440	+
BSU00370	BSU02470	-
BSU25200	BSU22120	+
BSU25200	BSU22030	+
BSU23450	BSU10390	+
BSU16170	BSU16160	-
BSU24610	BSU33400	-
BSU28410	BSU17700	+
BSU14480	BSU14930	-
BSU29740	BSU29100	-
BSU16170	BSU18010	-
BSU39660	BSU39640	+
BSU29400	BSU29380	+
BSU23520	BSU01610	-
BSU33840	BSU33830	-
BSU25200	BSU13700	+
BSU16170	BSU32090	-
BSU04730	BSU29100	+
BSU13310	BSU32250	-
BSU16170	BSU02690	-
BSU00370	BSU22550	-
BSU03750	BSU07990	+
BSU15320	BSU19870	+
BSU16170	BSU16460	-
BSU16470	BSU16220	+
BSU25200	BSU16750	+
BSU15320	BSU32350	+
BSU00370	BSU12080	-
BSU17850	BSU20440	-
BSU15320	BSU37850	+
BSU29740	BSU38190	-
BSU25200	BSU15120	+
BSU29740	BSU37460	-
BSU04730	BSU14670	+
BSU35230	BSU16230	+
BSU04100	BSU04050	-
BSU40350	BSU17850	-
BSU16170	BSU40330	-
BSU09270	BSU09300	+
BSU16470	BSU18610	+
BSU24220	BSU17900	+
BSU01730	BSU23830	+
BSU27120	BSU24120	+
BSU10420	BSU40890	+
BSU25200	BSU41060	+
BSU01810	BSU01820	-
BSU25200	BSU19180	+
BSU35490	BSU16240	-
BSU25200	BSU24180	+
BSU15320	BSU09165	+
BSU14140	BSU29140	-
BSU10420	BSU28030	+
BSU00370	BSU07480	-
BSU36420	BSU24380	-
BSU04730	BSU04740	+
BSU25200	BSU37250	+
BSU32420	BSU36660	+
BSU28410	BSU39580	+
BSU25200	BSU00510	+
BSU25200	BSU37550	+
BSU27910	BSU32250	-
BSU25200	BSU35550	+
BSU04730	BSU13640	+
BSU25200	BSU40160	+
BSU00370	BSU39950	-
BSU25200	BSU06510	+
BSU13310	BSU19579	-
BSU25200	BSU08230	+
BSU00980	BSU25230	+
BSU15330	BSU40880	+
BSU14020	BSU28910	-
BSU33970	BSU28510	-
BSU25760	BSU17310	+
BSU29110	BSU24980	+
BSU16170	BSU11370	-
BSU04730	BSU04200	+
BSU04730	BSU00850	+
BSU00370	BSU37770	-
BSU09380	BSU03300	-
BSU34200	BSU37760	+
BSU25760	BSU30910	+
BSU24220	BSU03220	+
BSU07590	BSU07620	+
BSU01730	BSU27180	+
BSU15320	BSU24120	+
BSU40410	BSU18380	-
BSU01730	BSU18590	+
BSU25200	BSU23120	+
BSU35080	BSU35060	-
BSU24220	BSU16250	-
BSU24220	BSU00010	-
BSU09520	BSU35650	+
BSU25200	BSU39700	+
BSU29740	BSU27060	-
BSU23100	BSU27180	+
BSU15320	BSU12050	+
BSU16170	BSU37720	-
BSU24610	BSU35640	-
BSU09990	BSU29100	-
BSU25200	BSU29120	+
BSU25760	BSU34520	+
BSU11500	BSU15110	+
BSU23450	BSU33070	+
BSU35030	BSU35020	-
BSU25760	BSU17420	+
BSU29740	BSU24150	-
BSU25760	BSU37900	+
BSU16470	BSU35310	+
BSU25200	BSU36600	+
BSU25200	BSU01190	+
BSU28550	BSU32850	-
BSU04730	BSU02930	+
BSU25200	BSU24730	+
BSU35490	BSU35890	+
BSU16470	BSU16190	+
BSU35490	BSU16200	-
BSU17850	BSU35770	-
BSU15320	BSU24430	+
BSU18460	BSU18440	+
BSU24220	BSU16220	-
BSU23100	BSU38500	+
BSU24250	BSU29450	-
BSU24100	BSU24060	+
BSU25200	BSU29679	+
BSU28410	BSU11770	+
BSU16170	BSU40320	-
BSU15320	BSU33470	+
BSU23450	BSU27310	+
BSU00370	BSU18780	-
BSU25200	BSU22130	+
BSU23450	BSU36760	+
BSU08100	BSU08080	+
BSU15330	BSU03690	+
BSU09520	BSU15220	+
BSU29740	BSU16090	-
BSU15320	BSU39000	+
BSU23450	BSU18020	+
BSU01810	BSU01810	-
BSU25200	BSU09270	+
BSU23100	BSU38270	+
BSU25200	BSU01340	+
BSU36420	BSU15210	-
BSU00560	BSU23401	+
BSU25200	BSU23280	+
BSU18000	BSU28410	U
BSU29400	BSU29320	+
BSU00370	BSU04990	-
BSU38700	BSU38670	+
BSU13310	BSU36910	-
BSU25200	BSU34970	+
BSU25760	BSU28410	+
BSU25200	BSU10640	+
BSU25200	BSU00760	+
BSU25200	BSU28220	+
BSU27520	BSU09130	-
BSU29740	BSU05840	-
BSU16170	BSU36650	-
BSU14240	BSU33750	-
BSU23450	BSU36780	+
BSU25200	BSU33080	+
BSU16170	BSU17190	+
BSU34720	BSU34720	+
BSU00370	BSU10420	-
BSU25200	BSU29740	+
BSU15320	BSU22800	+
BSU24610	BSU24620	-
BSU36420	BSU06930	+
BSU15320	BSU00160	+
BSU25250	BSU30560	-
BSU17850	BSU01520	-
BSU15330	BSU16790	+
BSU15320	BSU24420	+
BSU16170	BSU11460	-
BSU27120	BSU19250	+
BSU14240	BSU10420	-
BSU23520	BSU03280	-
BSU15320	BSU25770	+
BSU27120	BSU30330	+
BSU09520	BSU09520	+
BSU16170	BSU02250	-
BSU25200	BSU37310	+
BSU26350	BSU26259	-
BSU07390	BSU07390	-
BSU13310	BSU40480	-
BSU04730	BSU09390	+
BSU16170	BSU17210	+
BSU25760	BSU19890	+
BSU27120	BSU27170	+
BSU25200	BSU15480	+
BSU00370	BSU05850	+
BSU16170	BSU16340	-
BSU29740	BSU39750	-
BSU25200	BSU01389	+
BSU25200	BSU03940	+
BSU23100	BSU35650	+
BSU35490	BSU16360	U-
BSU28410	BSU07270	+
BSU29740	BSU24160	-
BSU15320	BSU08980	+
BSU15320	BSU24140	+
BSU25200	BSU34290	+
BSU29740	BSU39370	-
BSU25760	BSU10610	+
BSU16470	BSU35630	+
BSU25200	BSU34750	+
BSU00370	BSU38340	-
BSU25200	BSU35760	+
BSU32420	BSU32460	+-
BSU18460	BSU18450	+
BSU01730	BSU38260	+
BSU25200	BSU15550	+
BSU25200	BSU33540	+
BSU23450	BSU15680	+
BSU28550	BSU32840	-
BSU25200	BSU39460	+
BSU25200	BSU27270	+
BSU24100	BSU24080	+
BSU25200	BSU22320	+
BSU04730	BSU18510	+
BSU09990	BSU10300	-
BSU29740	BSU39400	-
BSU28550	BSU10270	-
BSU33790	BSU33780	-
BSU15470	BSU15560	+-
BSU07010	BSU07060	+
BSU16170	BSU11230	-
BSU01730	BSU35100	+
BSU04730	BSU13169	+
BSU16470	BSU38800	+
BSU34180	BSU34190	-
BSU16470	BSU16320	+
BSU25200	BSU37650	+
BSU24220	BSU16420	-
BSU00370	BSU17110	-
BSU02680	BSU39990	-
BSU00370	BSU05200	-
BSU25200	BSU26320	+
BSU24220	BSU16300	-
BSU29740	BSU29690	-
BSU25200	BSU33440	+
BSU15330	BSU22930	+
BSU28410	BSU30890	+
BSU29740	BSU17580	-
BSU25200	BSU17260	+
BSU29110	BSU03520	+
BSU24220	BSU16450	-
BSU25760	BSU19110	+
BSU04730	BSU25300	+
BSU27120	BSU24140	+
BSU25200	BSU29610	+
BSU29110	BSU24960	+
BSU35490	BSU16480	U-
BSU16470	BSU38500	+
BSU25760	BSU13780	+
BSU23520	BSU03320	-
BSU16470	BSU38530	+
BSU22440	BSU10340	-
BSU29400	BSU29330	+
BSU25100	BSU26830	-
BSU25200	BSU02530	+
BSU01730	BSU06180	+
BSU23100	BSU38520	+
BSU14480	BSU21480	+
BSU25200	BSU15930	+
BSU25200	BSU15980	+
BSU25200	BSU05830	+
BSU22770	BSU22660	+-
BSU23120	BSU37410	+
BSU25200	BSU10270	+
BSU35080	BSU35080	-
BSU34200	BSU37790	+
BSU38700	BSU38660	+
BSU15330	BSU25110	+
BSU36600	BSU24010	+
BSU29740	BSU29120	-
BSU29740	BSU28750	-
BSU35230	BSU16290	+
BSU24610	BSU38360	-
BSU09520	BSU38280	+
BSU28410	BSU36040	-
BSU25200	BSU07610	+
BSU25200	BSU11520	+
BSU16470	BSU00590	+
BSU25760	BSU30880	+
BSU12370	BSU12390	-
BSU00370	BSU14750	-
BSU25200	BSU34310	+
BSU00470	BSU06430	-
BSU25200	BSU19930	+
BSU27120	BSU33560	+
BSU15880	BSU09540	-
BSU00370	BSU22820	-
BSU23120	BSU37310	+
BSU23100	BSU38530	+
BSU29740	BSU08200	-
BSU25200	BSU28070	+
BSU14480	BSU34390	+
BSU13310	BSU08370	+
BSU04820	BSU04980	-
BSU25200	BSU08180	+
BSU25200	BSU08840	+
BSU35490	BSU31850	+
BSU29740	BSU23140	-
BSU34380	BSU35640	-
BSU04730	BSU40210	+
BSU05850	BSU05830	-
BSU27520	BSU29280	-
BSU09520	BSU15240	+
BSU25200	BSU06530	+
BSU36420	BSU15030	-
BSU24220	BSU35510	-
BSU15330	BSU09140	+
BSU15330	BSU23410	+
BSU40410	BSU35700	+
BSU29110	BSU03480	+
BSU16470	BSU19749	+
BSU25200	BSU01370	+
BSU34200	BSU40320	+
BSU09520	BSU04230	+
BSU25200	BSU15310	+
BSU25200	BSU38420	+
BSU33970	BSU28760	-
BSU35230	BSU16390	+
BSU00370	BSU15330	-
BSU25200	BSU10650	+
BSU04730	BSU12210	+
BSU16170	BSU18000	-
BSU00370	BSU26230	-
BSU33221	BSU35630	-
BSU13310	BSU37940	-
BSU25200	BSU15230	+
BSU16470	BSU35230	+
BSU29740	BSU28550	-
BSU14020	BSU31980	-
BSU04730	BSU40040	+
BSU29400	BSU29360	+
BSU25200	BSU27240	+
BSU29740	BSU30280	-
BSU36420	BSU17700	-
BSU29110	BSU01950	+
BSU14240	BSU37370	-
BSU25200	BSU29730	+
BSU25200	BSU29010	+
BSU25760	BSU12490	+
BSU23520	BSU08450	-
BSU12000	BSU12020	+
BSU15330	BSU17760	+
BSU00370	BSU25840	-
BSU16470	BSU16230	+
BSU16170	BSU36640	-
BSU25760	BSU00270	+
BSU23100	BSU00630	+
BSU15330	BSU34470	+
BSU25200	BSU01400	+
BSU25200	BSU39770	+
BSU00560	BSU08650	-
BSU36420	BSU24390	-
BSU28550	BSU37160	-
BSU16170	BSU16140	-
BSU25200	BSU12390	+
BSU12560	BSU12620	+
BSU29740	BSU38760	-
BSU15330	BSU23420	+
BSU16170	BSU03770	-
BSU23520	BSU32000	-
BSU15320	BSU19940	+
BSU25200	BSU33930	+
BSU23450	BSU24700	+
BSU23450	BSU14960	+
BSU16170	BSU16400	-
BSU25200	BSU03290	+
BSU29110	BSU40280	+
BSU25760	BSU17410	+
BSU16170	BSU29600	-
BSU04730	BSU04370	+
BSU28550	BSU14071	-
BSU00370	BSU35930	+
BSU01730	BSU06270	+
BSU23450	BSU24670	+
BSU09520	BSU00600	+
BSU29740	BSU04700	-
BSU15320	BSU12350	+
BSU29740	BSU04720	-
BSU14240	BSU40170	-
BSU04730	BSU40570	+
BSU25760	BSU28320	+
BSU26720	BSU26690	-
BSU36420	BSU09770	+
BSU04100	BSU04070	-
BSU30460	BSU30460	-
BSU25200	BSU18450	+
BSU14480	BSU07750	-
BSU28850	BSU28840	-
BSU14240	BSU37410	-
BSU29740	BSU39250	-
BSU04730	BSU04400	+
BSU15330	BSU09750	+
BSU31530	BSU07570	+
BSU24220	BSU32770	+
BSU00370	BSU21560	-
BSU38310	BSU38330	+
BSU04820	BSU04850	-
BSU29110	BSU13330	+
BSU31680	BSU03500	+
BSU36420	BSU25760	+
BSU25200	BSU33910	+
BSU35490	BSU16330	U-
BSU23100	BSU02900	+
BSU23100	BSU02910	+
BSU30460	BSU30450	-
BSU26430	BSU26450	+
BSU23520	BSU01600	-
BSU00370	BSU33780	-
BSU25760	BSU08620	+
BSU25200	BSU01960	+
BSU29110	BSU01970	+
BSU36020	BSU36010	+
BSU25200	BSU38860	+
BSU14240	BSU33770	-
BSU15880	BSU11340	-
BSU00370	BSU18300	-
BSU25200	BSU16330	+
BSU04730	BSU04340	+
BSU25200	BSU36650	+
BSU25200	BSU35610	+
BSU25200	BSU28500	+
BSU29000	BSU17390	-
BSU27520	BSU29310	-
BSU04730	BSU00870	+
BSU25200	BSU12960	+
BSU25200	BSU33430	+
BSU23450	BSU15320	+
BSU16170	BSU24100	-
BSU25760	BSU14970	+
BSU22440	BSU30220	-
BSU14020	BSU31990	-
BSU15470	BSU15550	+-
BSU25200	BSU06440	+
BSU05970	BSU09840	-
BSU01730	BSU02900	+
BSU29740	BSU19410	-
BSU29740	BSU08180	-
BSU26430	BSU26410	+
BSU15320	BSU12380	+
BSU14380	BSU14390	-
BSU25200	BSU17400	+
BSU13670	BSU05490	-
BSU25200	BSU07900	+
BSU24220	BSU15380	-
BSU35230	BSU16280	+
BSU04730	BSU05150	+
BSU25200	BSU35680	+
BSU13310	BSU03320	+
BSU00370	BSU39590	-
BSU27120	BSU38970	+
BSU00560	BSU16799	-
BSU15330	BSU33050	+
BSU25200	BSU35560	+
BSU33950	BSU33940	-
BSU25200	BSU05840	+
BSU26720	BSU26710	-
BSU25200	BSU10660	+
BSU00370	BSU09700	-
BSU25200	BSU40030	+
BSU23520	BSU38280	-
BSU29740	BSU04160	-
BSU23450	BSU00680	+
BSU25760	BSU06300	+
BSU38460	BSU38450	+
BSU16170	BSU11430	-
BSU15330	BSU03920	+
BSU25200	BSU34720	+
BSU15320	BSU24380	+
BSU00370	BSU18150	-
BSU00370	BSU36250	-
BSU17850	BSU29230	-
BSU25200	BSU34300	+
BSU04730	BSU04680	+
BSU04730	BSU39050	+
BSU27120	BSU28000	+
BSU28410	BSU10610	-
BSU00370	BSU05870	+
BSU13450	BSU13460	+
BSU04730	BSU36960	+
BSU16170	BSU16230	-
BSU23520	BSU13850	-
BSU09520	BSU36530	+
BSU17850	BSU24750	-
BSU03750	BSU18180	+
BSU03750	BSU18170	+
BSU25200	BSU35370	+
BSU24220	BSU06570	+
BSU31680	BSU15910	+
BSU16170	BSU28310	-
BSU34380	BSU35620	-
BSU25200	BSU35920	+
BSU25200	BSU01935	+
BSU15330	BSU10970	+
BSU15320	BSU09780	+
BSU40350	BSU40340	+
BSU15320	BSU25060	+
BSU04730	BSU07750	+
BSU35230	BSU16470	+
BSU04730	BSU07790	+
BSU04160	BSU03981	+
BSU13450	BSU14470	+
BSU25200	BSU21690	+
BSU01730	BSU27170	+
BSU25200	BSU35010	+
BSU25200	BSU28440	+
BSU29110	BSU40260	+
BSU29740	BSU39680	-
BSU23520	BSU01630	-
BSU25200	BSU06320	+
BSU24610	BSU34250	-
BSU25200	BSU08650	+
BSU00560	BSU23390	+
BSU25200	BSU25800	+
BSU27520	BSU08830	-
BSU05970	BSU38060	-
BSU36420	BSU15090	+
BSU15330	BSU23480	+
BSU15320	BSU01530	+
BSU16470	BSU16290	+
BSU04730	BSU09140	+
BSU16170	BSU39900	-
BSU25200	BSU23270	+
BSU25200	BSU31210	+
BSU25200	BSU31570	+
BSU25200	BSU36780	+
BSU23100	BSU08600	+
BSU01730	BSU06190	+
BSU02500	BSU02470	-
BSU29740	BSU14880	-
BSU00560	BSU13390	-
BSU29110	BSU23110	+
BSU25200	BSU24990	+
BSU25200	BSU16610	+
BSU23450	BSU25780	+
BSU04730	BSU30700	+
BSU25200	BSU16230	+
BSU27120	BSU38520	+
BSU11500	BSU27270	+
BSU25200	BSU17600	+
BSU09990	BSU29110	-
BSU23450	BSU16800	+
BSU25200	BSU12370	+
BSU15330	BSU23430	+
BSU24220	BSU00640	+
BSU01730	BSU00260	+
BSU39770	BSU39750	-
BSU25250	BSU29020	-
BSU15330	BSU25130	+
BSU38460	BSU38460	+
BSU28410	BSU37910	+
BSU27520	BSU39470	-
BSU23450	BSU38730	+
BSU09520	BSU27170	+
BSU15330	BSU07760	+
BSU28410	BSU19750	+
BSU01730	BSU30000	+
BSU23450	BSU24490	+
BSU04730	BSU33600	+
BSU13310	BSU11430	+
BSU25200	BSU31500	+
BSU29740	BSU40080	-
BSU10420	BSU41010	+
BSU25200	BSU07820	+
BSU01730	BSU31000	+
BSU25200	BSU28280	+
BSU13310	BSU03670	+
BSU24610	BSU10300	-
BSU25200	BSU16310	+
BSU29740	BSU39670	-
BSU00370	BSU24640	-
BSU15330	BSU38620	+
BSU24610	BSU40300	-
BSU25200	BSU16410	+
BSU01730	BSU38940	+
BSU09990	BSU11382	-
BSU25200	BSU25590	+
BSU25200	BSU12900	+
BSU00370	BSU02480	-
BSU33080	BSU33120	+
BSU04730	BSU07890	+
BSU10420	BSU24730	+
BSU13310	BSU28260	-
BSU25760	BSU17700	+
BSU25200	BSU36000	+
BSU35490	BSU16300	U-
BSU00560	BSU02080	-
BSU29740	BSU31200	-
BSU17850	BSU09810	-
BSU00980	BSU13990	+
BSU16470	BSU29930	+
BSU09520	BSU07260	+
BSU25200	BSU34980	+
BSU00370	BSU01950	-
BSU04730	BSU07770	+
BSU25200	BSU18840	+
BSU23450	BSU35609	+
BSU35490	BSU31875	+
BSU19120	BSU33490	-
BSU15320	BSU26390	+
BSU29740	BSU35910	-
BSU25200	BSU35880	+
BSU35490	BSU16380	U-
BSU11500	BSU22460	+
BSU25200	BSU35870	+
BSU25760	BSU19870	+
BSU25200	BSU33780	+
BSU00370	BSU37700	-
BSU29110	BSU18920	+
BSU25200	BSU22790	+
BSU09270	BSU02130	+
BSU25100	BSU02870	-
BSU05970	BSU36000	-
BSU29740	BSU39700	-
BSU04730	BSU23300	+
BSU25200	BSU29470	+
BSU00370	BSU21540	-
BSU00370	BSU21580	-
BSU25760	BSU19750	+
BSU22770	BSU22670	+-
BSU27120	BSU33570	+
BSU25200	BSU13910	+
BSU15320	BSU19830	+
BSU31680	BSU03520	+
BSU00560	BSU02070	-
BSU15320	BSU30970	+
BSU23450	BSU00650	+
BSU32560	BSU32600	-
BSU31680	BSU05020	+
BSU01730	BSU06210	+
BSU27120	BSU14480	+
BSU25200	BSU37320	+
BSU29400	BSU29390	+
BSU40350	BSU40350	-
BSU15320	BSU11760	+
BSU00560	BSU03700	-
BSU23520	BSU33300	-
BSU25200	BSU00530	+
BSU00370	BSU17250	-
BSU16170	BSU37680	-
BSU25200	BSU17370	+
BSU25200	BSU00030	+
BSU00560	BSU23930	-
BSU40410	BSU12100	-
BSU00370	BSU25870	-
BSU15090	BSU36070	+
BSU16170	BSU39360	-
BSU36420	BSU25360	-
BSU23450	BSU27300	+
BSU25200	BSU29820	+
BSU36420	BSU09830	-
BSU01730	BSU29520	+
BSU16170	BSU32600	-
BSU00370	BSU33140	-
BSU25200	BSU29280	+
BSU14020	BSU31960	-
BSU15330	BSU19950	+
BSU02500	BSU02510	-
BSU13670	BSU05500	-
BSU01730	BSU00590	+
BSU29740	BSU14920	-
BSU25760	BSU16770	+
BSU25760	BSU16750	+
BSU04730	BSU06400	+
BSU13310	BSU11390	+
BSU25200	BSU15900	+
BSU09520	BSU38260	+
BSU00010	BSU36950	-
BSU29740	BSU28910	-
BSU00370	BSU31980	-
BSU25810	BSU25810	-
BSU11500	BSU22490	+
BSU29740	BSU14890	-
BSU33520	BSU19970	-
BSU29740	BSU34200	-
BSU15320	BSU25530	+
BSU01040	BSU01050	-
BSU23450	BSU40950	+
BSU15330	BSU23440	+
BSU33221	BSU38530	+
BSU24610	BSU34300	-
BSU00470	BSU06530	-
BSU16170	BSU32730	+
BSU29740	BSU35960	-
BSU25200	BSU03510	+
BSU13310	BSU30360	-
BSU24220	BSU16260	-
BSU14140	BSU18000	-
BSU25200	BSU25790	+
BSU16470	BSU16270	+
BSU29740	BSU31210	-
BSU24220	BSU16180	-
BSU23100	BSU02290	+
BSU25200	BSU19900	+
BSU16470	BSU14010	+
BSU16170	BSU28300	-
BSU25760	BSU10710	+
BSU23450	BSU00850	+
BSU25200	BSU35580	+
BSU01540	BSU09990	-
BSU15320	BSU09940	+
BSU25200	BSU09330	+
BSU36420	BSU24400	-
BSU25200	BSU16250	+
BSU25760	BSU19860	+
BSU28410	BSU05550	-
BSU25200	BSU06480	+
BSU24220	BSU29630	+
BSU15330	BSU03710	+
BSU15320	BSU18240	+
BSU00830	BSU00870	-
BSU16170	BSU24030	-
BSU25200	BSU25580	+
BSU08340	BSU34420	-
BSU16170	BSU11220	-
BSU25200	BSU31970	+
BSU25200	BSU36240	+
BSU39770	BSU39680	-
BSU38700	BSU38650	+
BSU28410	BSU11750	+
BSU13670	BSU12870	-
BSU00470	BSU06370	-
BSU09380	BSU13360	-
BSU13310	BSU36660	+
BSU10420	BSU40910	+
BSU15320	BSU28960	+
BSU01050	BSU01050	-
BSU29740	BSU40310	-
BSU04730	BSU02900	+
BSU04730	BSU17250	+
BSU00980	BSU25200	+
BSU29740	BSU20850	-
BSU16470	BSU38510	+
BSU09270	BSU09290	+
BSU29740	BSU14120	-
BSU29740	BSU25890	-
BSU05970	BSU38760	-
BSU34180	BSU34050	-
BSU38070	BSU38050	+
BSU40350	BSU40320	+
BSU40410	BSU13820	+
BSU18000	BSU38150	U
BSU16170	BSU21870	-
BSU14020	BSU28900	-
BSU15330	BSU08500	+
BSU31680	BSU03490	+
BSU00370	BSU32000	-
BSU25200	BSU19460	+
BSU25200	BSU19850	+
BSU08620	BSU08650	-
BSU25200	BSU14850	+
BSU28550	BSU28520	-
BSU13310	BSU38850	+
BSU35490	BSU36240	+
BSU25200	BSU37710	+
BSU24220	BSU24930	-
BSU29110	BSU01960	+
BSU24610	BSU35490	-
BSU27520	BSU39480	-
BSU13310	BSU11400	+
BSU04730	BSU24000	+
BSU37310	BSU37320	+
BSU36420	BSU15270	-
BSU29740	BSU03770	-
BSU25200	BSU39380	+
BSU23450	BSU32070	+
BSU25200	BSU18000	+
BSU25200	BSU05450	+
BSU25200	BSU33900	+
BSU25200	BSU33710	+
BSU03750	BSU40490	+
BSU07010	BSU07050	+
BSU25200	BSU17450	+
BSU25490	BSU25440	-
BSU28410	BSU37880	+
BSU16470	BSU16260	+
BSU25250	BSU21820	+
BSU25200	BSU24010	+
BSU39080	BSU39070	+
BSU25200	BSU36480	+
BSU14480	BSU21450	+
BSU25200	BSU32990	+
BSU24220	BSU16190	-
BSU09520	BSU00710	+
BSU25200	BSU23250	+
BSU15320	BSU23180	+
BSU25760	BSU10720	+
BSU16170	BSU16450	-
BSU25200	BSU28760	+
BSU15330	BSU15320	+
BSU32420	BSU32480	+
BSU00980	BSU33040	+
BSU24220	BSU00370	-
BSU10420	BSU10460	+
BSU00010	BSU41020	-
BSU35490	BSU16390	U-
BSU15330	BSU15310	+
BSU23450	BSU11410	+
BSU04100	BSU04100	-
BSU00370	BSU18330	-
BSU00470	BSU06440	-
BSU25200	BSU08240	+
BSU25200	BSU09420	+
BSU16470	BSU35440	+
BSU15330	BSU38610	+
BSU18000	BSU29140	-
BSU01730	BSU18580	+
BSU25200	BSU03500	+
BSU25760	BSU19900	+
BSU29740	BSU12320	-
BSU36420	BSU01570	-
BSU15320	BSU06910	+
BSU29110	BSU05730	+
BSU23100	BSU38540	+
BSU30460	BSU30410	-
BSU00370	BSU19210	-
BSU11500	BSU19470	+
BSU33080	BSU05720	+
BSU17850	BSU21500	-
BSU04730	BSU08500	+
BSU15320	BSU18220	+
BSU25200	BSU28170	+
BSU16470	BSU35420	+
BSU24220	BSU15320	+
BSU24610	BSU35630	-
BSU29000	BSU17400	-
BSU00370	BSU21450	-
BSU15330	BSU08310	+
BSU04730	BSU07760	+
BSU00830	BSU28500	-
BSU29740	BSU34130	-
BSU25760	BSU32640	+
BSU28410	BSU32640	+
BSU13450	BSU04400	+
BSU22440	BSU30240	-
BSU04730	BSU38430	+
BSU35490	BSU35220	+
BSU12370	BSU12370	-
BSU10420	BSU33260	+
BSU29740	BSU05850	-
BSU13310	BSU35500	-
BSU25200	BSU29320	+
BSU31680	BSU03480	+
BSU00470	BSU32130	-
BSU27520	BSU29290	-
BSU02370	BSU02380	-
BSU13310	BSU36920	-
BSU16470	BSU16370	+
BSU23450	BSU24690	+
BSU25200	BSU32000	+
BSU00370	BSU31970	-
BSU25200	BSU01200	+
BSU25200	BSU36120	+
BSU16470	BSU38100	+
BSU25200	BSU16480	+
BSU15330	BSU13930	+
BSU17450	BSU13310	-
BSU25200	BSU10550	+
BSU28410	BSU11320	+
BSU25200	BSU05810	+
BSU38420	BSU34470	+
BSU24220	BSU01920	+
BSU26430	BSU12890	+
BSU15330	BSU33060	+
BSU25200	BSU08660	+
BSU24610	BSU34030	-
BSU25200	BSU33510	+
BSU39080	BSU39270	+
BSU25200	BSU34990	+
BSU13310	BSU28250	-
BSU04730	BSU04280	+
BSU25200	BSU14720	+
BSU11500	BSU22450	+
BSU01730	BSU08570	+
BSU09520	BSU11490	+
BSU16170	BSU28260	-
BSU25200	BSU06839	+
BSU23120	BSU14900	+
BSU25200	BSU19910	+
BSU15670	BSU34340	+
BSU16470	BSU16180	+
BSU25200	BSU00060	+
BSU36420	BSU22200	-
BSU23450	BSU35600	+
BSU25200	BSU28550	+
BSU16170	BSU16220	-
BSU16170	BSU32570	-
BSU25200	BSU16940	+
BSU25200	BSU28010	+
BSU19120	BSU26640	-
BSU25200	BSU37430	+
BSU25200	BSU10630	+
BSU23120	BSU38740	+
BSU15320	BSU00620	+
BSU04730	BSU30070	+
BSU25200	BSU40080	+
BSU25200	BSU40090	+
BSU17850	BSU29220	-
BSU33520	BSU19880	-
BSU25200	BSU40420	+
BSU15320	BSU06930	+
BSU02370	BSU02370	-
BSU29740	BSU14910	-
BSU33080	BSU33090	+
BSU04820	BSU04950	-
BSU25760	BSU09165	+
BSU04730	BSU40259	+
BSU00370	BSU37760	-
BSU04730	BSU02590	+
BSU35080	BSU10730	+
BSU28410	BSU11760	+
BSU04730	BSU04380	+
BSU32420	BSU32410	+
BSU25200	BSU31460	+
BSU40410	BSU35760	+
BSU25760	BSU10680	+
BSU39340	BSU39360	+
BSU25200	BSU19870	+
BSU25760	BSU07280	+
BSU00370	BSU18320	-
BSU23120	BSU22550	+
BSU23100	BSU02280	+
BSU28920	BSU28900	+
BSU28410	BSU07300	+
BSU25100	BSU03350	-
BSU00370	BSU39920	-
BSU25200	BSU16190	+
BSU25200	BSU15630	+
BSU25200	BSU39680	+
BSU14240	BSU37380	-
BSU25200	BSU33110	+
BSU25200	BSU10540	+
BSU29400	BSU29290	+
BSU15330	BSU37510	+
BSU04730	BSU37240	+
BSU25200	BSU04730	+
BSU29110	BSU35570	+
BSU24610	BSU34040	-
BSU16170	BSU17180	+
BSU00370	BSU15320	-
BSU28850	BSU28860	-
BSU15320	BSU30080	+
BSU35490	BSU16350	U-
BSU23450	BSU39060	+
BSU23120	BSU14920	+
BSU25200	BSU01760	+
BSU29740	BSU06960	-
BSU24220	BSU22270	+
BSU24220	BSU38540	-
BSU23520	BSU13360	-
BSU24220	BSU14500	+
BSU29740	BSU12330	-
BSU34720	BSU34690	+
BSU29740	BSU38200	-
BSU15330	BSU01520	+
BSU25200	BSU39750	+
BSU29740	BSU10270	-
BSU04730	BSU05790	+
BSU00830	BSU34540	-
BSU00470	BSU06520	-
BSU15320	BSU17030	+
BSU04730	BSU37230	+
BSU25200	BSU35290	+
BSU25200	BSU15510	+
BSU17850	BSU40350	-
BSU00370	BSU39870	-
BSU33790	BSU32850	+
BSU15320	BSU27430	+
BSU25200	BSU22090	+
BSU15320	BSU24390	+
BSU23450	BSU15330	+
BSU03960	BSU03960	-
BSU25200	BSU11300	+
BSU24610	BSU24640	-
BSU15330	BSU35820	+
BSU09520	BSU04570	+
BSU25200	BSU29110	+
BSU11500	BSU27250	+
BSU01730	BSU25390	+
BSU29740	BSU39070	-
BSU00370	BSU37350	-
BSU09520	BSU23370	+
BSU24220	BSU39880	+
BSU29740	BSU39760	-
BSU35490	BSU16190	-
BSU00370	BSU34380	-
BSU25200	BSU02350	+
BSU00980	BSU18920	+
BSU25200	BSU38570	+
BSU29740	BSU28810	-
BSU00370	BSU18310	-
BSU25200	BSU00770	+
BSU04730	BSU11500	+
BSU16170	BSU16290	-
BSU00370	BSU37730	-
BSU25200	BSU25510	+
BSU25760	BSU19830	+
BSU25200	BSU23260	+
BSU15670	BSU24630	+
BSU25200	BSU36230	+
BSU26720	BSU26700	-
BSU07390	BSU07400	-
BSU16170	BSU12980	-
BSU25200	BSU11200	+
BSU00370	BSU01740	-
BSU25200	BSU19860	+
BSU15320	BSU29239	+
BSU15330	BSU09410	+
BSU28410	BSU10670	-
BSU15320	BSU29090	+
BSU25200	BSU14710	+
BSU25760	BSU30860	+
BSU15320	BSU07280	+
BSU12560	BSU12630	+
BSU25760	BSU07270	+
BSU09520	BSU00890	+
BSU16470	BSU16350	+
BSU25200	BSU01290	+
BSU25200	BSU03981	+
BSU09520	BSU02900	+
BSU25200	BSU28560	+
BSU15330	BSU07930	+
BSU24220	BSU06580	+
BSU00980	BSU37030	+
BSU16170	BSU32240	-
BSU36420	BSU15230	-
BSU27520	BSU27270	-
BSU13310	BSU27810	+
BSU29110	BSU35310	+
BSU33230	BSU33222	+
BSU00560	BSU03710	-
BSU36420	BSU11770	+
BSU04820	BSU04960	-
BSU39770	BSU39780	-
BSU25200	BSU03300	+
BSU00670	BSU00690	+
BSU00370	BSU33410	-
BSU01730	BSU18980	+
BSU27080	BSU27060	+
BSU04730	BSU16620	+
BSU24220	BSU10760	+
BSU09270	BSU02140	+
BSU16170	BSU25840	-
BSU25200	BSU38260	+
BSU25200	BSU24970	+
BSU35490	BSU35450	+
BSU25200	BSU34360	+
BSU08730	BSU28170	-
BSU25200	BSU31490	+
BSU25200	BSU00540	+
BSU09380	BSU14160	-
BSU23120	BSU37360	+
BSU16170	BSU38550	-
BSU33222	BSU33239	+
BSU25200	BSU15730	+
BSU01730	BSU29530	+
BSU10420	BSU10620	+
BSU28410	BSU17970	-
BSU26350	BSU26270	-
BSU24220	BSU14490	+
BSU15320	BSU10610	+
BSU27120	BSU28040	+
BSU00560	BSU29570	+
BSU07220	BSU07230	-
BSU35490	BSU10420	+
BSU25200	BSU03890	+
BSU25200	BSU34700	+
BSU25200	BSU31740	+
BSU23100	BSU38260	+
BSU07820	BSU07810	-
BSU04730	BSU07550	+
BSU29110	BSU35720	-
BSU09520	BSU38510	+
BSU31680	BSU25840	+
BSU25200	BSU23310	+
BSU29740	BSU08100	-
BSU29110	BSU23150	+
BSU09520	BSU00860	+
BSU13670	BSU19570	-
BSU37650	BSU33430	+
BSU04730	BSU30790	+
BSU00370	BSU24650	-
BSU16170	BSU16320	-
BSU23520	BSU07530	-
BSU25200	BSU35450	+
BSU00370	BSU34280	-
BSU09520	BSU30510	+
BSU25200	BSU15610	+
BSU33221	BSU38540	+
BSU24220	BSU14110	+
BSU24220	BSU32760	+
BSU23450	BSU36550	+
BSU25200	BSU25440	+
BSU24610	BSU34220	-
BSU00370	BSU21470	-
BSU23520	BSU14160	-
BSU25200	BSU27280	+
BSU32560	BSU32570	-
BSU04730	BSU16610	+
BSU25760	BSU05550	+
BSU09520	BSU27160	+
BSU27120	BSU27990	+
BSU24220	BSU17890	-
BSU15320	BSU01570	+
BSU33680	BSU08240	-
BSU10420	BSU40900	+
BSU15320	BSU29100	+
BSU16470	BSU35220	+
BSU25200	BSU00860	+
BSU01730	BSU31010	+
BSU28410	BSU19770	+
BSU15320	BSU09400	+
BSU32870	BSU32870	-
BSU39770	BSU06230	-
BSU33080	BSU09320	+
BSU15090	BSU19780	+
BSU16170	BSU11210	-
BSU25200	BSU03670	+
BSU35490	BSU16180	-
BSU33221	BSU38510	+
BSU29740	BSU07820	-
BSU00370	BSU40050	+
BSU31680	BSU07560	+
BSU40410	BSU14470	+
BSU13310	BSU13330	+
BSU24610	BSU23470	-
BSU18000	BSU38170	U
BSU34200	BSU27030	+
BSU16170	BSU31560	-
BSU25100	BSU08880	-
BSU36420	BSU15220	-
BSU29740	BSU17570	-
BSU25200	BSU25290	+
BSU09990	BSU35450	-
BSU35230	BSU16310	+
BSU25200	BSU28260	+
BSU15320	BSU09770	+
BSU00370	BSU14940	-
BSU23450	BSU23460	+
BSU29740	BSU12000	-
BSU31070	BSU33730	-
BSU29110	BSU23130	+
BSU31680	BSU15900	+
BSU09520	BSU00620	+
BSU27120	BSU16950	+
BSU25760	BSU36060	+
BSU15330	BSU10900	+
BSU32560	BSU32610	-
BSU15330	BSU10110	+
BSU09990	BSU38400	-
BSU00370	BSU07460	-
BSU23120	BSU23120	+
BSU23520	BSU03830	-
BSU00370	BSU33280	-
BSU17850	BSU23720	-
BSU25200	BSU24660	+
BSU00560	BSU33070	-
BSU25200	BSU38270	+
BSU35490	BSU16470	U-
BSU05970	BSU03060	-
BSU36420	BSU31279	-
BSU24610	BSU23460	-
BSU00370	BSU06190	-
BSU25200	BSU38560	+
BSU05850	BSU05840	-
BSU09990	BSU37690	-
BSU23450	BSU08330	+
BSU25200	BSU12030	+
BSU16470	BSU28890	+
BSU16170	BSU17160	+
BSU25200	BSU01230	+
BSU16170	BSU11470	-
BSU16170	BSU16240	-
BSU15670	BSU34330	+
BSU24610	BSU24610	-
BSU25490	BSU06030	-
BSU00470	BSU36900	-
BSU35490	BSU31720	+
BSU29740	BSU34120	-
BSU00370	BSU34840	-
BSU16170	BSU14700	-
BSU25200	BSU11230	+
BSU25200	BSU31050	+
BSU14020	BSU13360	-
BSU04730	BSU08490	+
BSU25760	BSU05560	+
BSU02370	BSU02360	-
BSU25200	BSU28810	+
BSU23120	BSU17380	+
BSU39770	BSU39730	-
BSU10420	BSU24680	+
BSU31070	BSU33700	-
BSU34200	BSU24080	+
BSU00370	BSU31240	-
BSU11500	BSU22480	+
BSU25760	BSU37880	+
BSU25200	BSU39510	+
BSU15330	BSU10980	+
BSU16470	BSU16080	+
BSU25200	BSU30800	+
BSU09520	BSU36540	+
BSU25200	BSU00970	+
BSU25200	BSU40770	+
BSU28410	BSU22250	+
BSU25200	BSU02630	+
BSU00370	BSU39880	-
BSU25200	BSU12300	+
BSU04730	BSU35180	+
BSU08810	BSU09990	-
BSU00560	BSU03720	-
BSU14380	BSU14400	-
BSU16170	BSU11390	-
BSU00370	BSU02040	-
BSU25200	BSU34760	+
BSU25200	BSU05010	+
BSU25200	BSU32490	+
BSU25200	BSU38590	+
BSU29740	BSU12380	-
BSU35230	BSU16460	+
BSU23100	BSU27170	+
BSU23450	BSU00240	+
BSU34200	BSU08060	+
BSU00370	BSU17130	-
BSU25200	BSU14600	+
BSU15320	BSU18210	+
BSU15670	BSU34310	+
BSU33520	BSU19910	-
BSU23520	BSU04470	U
BSU15320	BSU15170	+
BSU23120	BSU38750	+
BSU23590	BSU23570	-
BSU23590	BSU23580	-
BSU00980	BSU18350	+
BSU25200	BSU13600	+
BSU25200	BSU39350	+
BSU29740	BSU38750	-
BSU05420	BSU05430	+
BSU29110	BSU07810	+
BSU00980	BSU27990	+
BSU16170	BSU32250	-
BSU29110	BSU03500	+
BSU04730	BSU23830	+
BSU00980	BSU28030	+
BSU15090	BSU36050	+
BSU25760	BSU30610	+
BSU35490	BSU35440	+
BSU16470	BSU16280	+
BSU24610	BSU34340	-
BSU05850	BSU05850	-
BSU26580	BSU26600	+
BSU33221	BSU35620	-
BSU25200	BSU16640	+
BSU29740	BSU35010	-
BSU34180	BSU24620	+
BSU11500	BSU29820	+
BSU14240	BSU40150	-
BSU24250	BSU40320	+
BSU00470	BSU06480	-
BSU33221	BSU21470	+
BSU00560	BSU23410	+
BSU15330	BSU39590	+
BSU04730	BSU18360	+
BSU08300	BSU08330	+
BSU16470	BSU29960	+
BSU15330	BSU40870	+
BSU03960	BSU03940	-
BSU00370	BSU05860	+
BSU00370	BSU33790	-
BSU31680	BSU03510	+
BSU28410	BSU11780	+
BSU00560	BSU15440	+
BSU29740	BSU39000	-
BSU25200	BSU32840	+
BSU17450	BSU36640	-
BSU29740	BSU39420	-
BSU00980	BSU03780	+
BSU27120	BSU23830	+
BSU25200	BSU07700	+
BSU11500	BSU34790	+
BSU15330	BSU09150	+
BSU25200	BSU28140	+
BSU16170	BSU39350	-
BSU25200	BSU28090	+
BSU25200	BSU16170	+
BSU19540	BSU19550	-
BSU25200	BSU00810	+
BSU29740	BSU27030	-
BSU25200	BSU16270	+
[truncated: 3,027 more rows]

## Sheet: Figure_1-Data
E. coli	LB30	All	median	0.00072	B. subtilis	LB	All	median	0.000842
			confidence interval	[ 0.000718 , 0.000722 ]				confidence interval	[ 0.000841 , 0.000843 ]
			min	4.4e-05				min	3.9e-05
			Q1	0.000391				Q1	0.000573
			Q3	0.001074				Q3	0.001093
			max	0.059113				max	0.045425
		TRN	median	0.000858			TRN	median	0.000936
			confidence interval	[ 0.000844 , 0.000880 ]				confidence interval	[ 0.000931 , 0.000965 ]
			min	5.4e-05				min	8.7e-05
			Q1	0.000378				Q1	0.000585
			Q3	0.001463				Q3	0.00133
			max	0.051499				max	0.032158
		P	median	0.000793			P	median	0.000934
			confidence interval	[ 0.000765 , 0.000824 ]				confidence interval	[ 0.000902 , 0.000915 ]
			min	5.4e-05				min	8.7e-05
			Q1	0.000367				Q1	0.00059
			Q3	0.001257				Q3	0.001251
			max	0.039276				max	0.030207
		N	median	0.001099			N	median	0.001051
			confidence interval	[ 0.001013 , 0.001269 ]				confidence interval	[ 0.001005 , 0.001098 ]
			min	6.4e-05				min	0.000104
			Q1	0.000403				Q1	0.000585
			Q3	0.002571				Q3	0.001742
			max	0.051499				max	0.032158
	LB37	All	median	0.000709		MM	All	median	0.000817
			confidence interval	[ 0.000706 , 0.000711 ]				confidence interval	[ 0.000813 , 0.000819 ]
			min	4.2e-05				min	3.4e-05
			Q1	0.00035				Q1	0.000479
			Q3	0.001067				Q3	0.001147
			max	0.064048				max	0.050138
		TRN	median	0.000803			TRN	median	0.000947
			confidence interval	[ 0.000771 , 0.000839 ]				confidence interval	[ 0.000950 , 0.000975 ]
			min	4.7e-05				min	6.2e-05
			Q1	0.000326				Q1	0.000491
			Q3	0.001491				Q3	0.001508
			max	0.071188				max	0.028354
		P	median	0.000732			P	median	0.000934
			confidence interval	[ 0.000703 , 0.000754 ]				confidence interval	[ 0.000903 , 0.000967 ]
			min	4.7e-05				min	6.9e-05
			Q1	0.000308				Q1	0.000476
			Q3	0.00122				Q3	0.001388
			max	0.043812				max	0.02218
		N	median	0.00116			N	median	0.001089
			confidence interval	[ 0.001029 , 0.001324 ]				confidence interval	[ 0.001061 , 0.001194 ]
			min	4.8e-05				min	6.2e-05
			Q1	0.000351				Q1	0.000519
			Q3	0.002697				Q3	0.001914
			max	0.071188				max	0.028354
	MM22	All	median	0.000713		Rif	All	median	0.000971
			confidence interval	[ 0.000711 , 0.000715 ]				confidence interval	[ 0.000924 , 0.000970 ]
			min	4.2e-05				min	7.3e-05
			Q1	0.000382				Q1	0.000681
			Q3	0.001088				Q3	0.001184
			max	0.059132				max	0.014452
		TRN	median	0.000931			TRN	median	0.001082
			confidence interval	[ 0.000896 , 0.000973 ]				confidence interval	[ 0.001031 , 0.001061 ]
			min	5.3e-05				min	0.000118
			Q1	0.000405				Q1	0.000731
			Q3	0.001514				Q3	0.001359
			max	0.052298				max	0.015509
		P	median	0.000871			P	median	0.001021
			confidence interval	[ 0.000800 , 0.000899 ]				confidence interval	[ 0.001002 , 0.001040 ]
			min	5.5e-05				min	0.000118
			Q1	0.000409				Q1	0.000717
			Q3	0.001309				Q3	0.001307
			max	0.052298				max	0.012357
		N	median	0.001172			N	median	0.001132
			confidence interval	[ 0.001086 , 0.001331 ]				confidence interval	[ 0.001102 , 0.001135 ]
			min	5.3e-05				min	0.00012
			Q1	0.000396				Q1	0.000762
			Q3	0.002669				Q3	0.0015
			max	0.040993				max	0.015509
	MM30	All	median	0.000515
			confidence interval	[ 0.000560 , 0.000567 ]
			min	1.5e-05
			Q1	0.000238
			Q3	0.000941
			max	0.141052
		TRN	median	0.000771
			confidence interval	[ 0.000737 , 0.000810 ]
			min	2.8e-05
			Q1	0.000245
			Q3	0.001504
			max	0.053904
		P	median	0.00066
			confidence interval	[ 0.000621 , 0.000703 ]
			min	3.5e-05
			Q1	0.000247
			Q3	0.001266
			max	0.044662
		N	median	0.001063
			confidence interval	[ 0.000964 , 0.001218 ]
			min	2.8e-05
			Q1	0.000243
			Q3	0.002768
			max	0.053904
	sMM30	All	median	0.000843
			confidence interval	[ 0.000835 , 0.000846 ]
			min	5.9e-05
			Q1	0.000465
			Q3	0.001248
			max	0.050198
		TRN	median	0.001021
			confidence interval	[ 0.000984 , 0.001048 ]
			min	6.7e-05
			Q1	0.000508
			Q3	0.001662
			max	0.030617
		P	median	0.000986
			confidence interval	[ 0.000956 , 0.001017 ]
			min	6.7e-05
			Q1	0.000516
			Q3	0.001513
			max	0.025037
		N	median	0.001291
			confidence interval	[ 0.001249 , 0.001433 ]
			min	8.3e-05
			Q1	0.000496
			Q3	0.002455
			max	0.030617
Q1: The first quartile (Q1), also known as the "smaller quartile", is equal to the 25th percentile of all values in the sample from small to large.
Q3: The third quartile (Q3), also known as the "larger quartile", is equal to the 75% figure after all the values in the sample are arranged from small to large.
Confidence interval: 95% confidence interval.

## Sheet: Figure_3-Data
E. coli	LB30	TRN	median	0.000858	B. subtilis	LB	TRN	median	0.000936
			confidence interval	[ 0.000844 , 0.000880 ]				confidence interval	[ 0.000933 , 0.000966 ]
			min	5.4e-05				min	8.7e-05
			Q1	0.000378				Q1	0.000585
			Q3	0.001463				Q3	0.00133
			max	0.051499				max	0.032158
		SIM	median	0.000867			SIM	median	0.001809
			confidence interval	[ 0.000583 , 0.001290 ]				confidence interval	[ 0.001108 , 0.002732 ]
			min	0.000227				min	0.00034
			Q1	0.000431				Q1	0.000727
			Q3	0.001293				Q3	0.003693
			max	0.026087				max	0.012969
		FFL	median	0.001373			FFL	median	0.001259
			confidence interval	[ 0.001300 , 0.001517 ]				confidence interval	[ 0.001192 , 0.001325 ]
			min	0.000108				min	0.000414
			Q1	0.00057				Q1	0.000737
			Q3	0.002748				Q3	0.001905
			max	0.021146				max	0.011584
	LB37	TRN	median	0.000805		MM	TRN	median	0.000946
			confidence interval	[ 0.000773 , 0.000841 ]				confidence interval	[ 0.000952 , 0.000974 ]
			min	4.7e-05				min	6.2e-05
			Q1	0.000326				Q1	0.000491
			Q3	0.001491				Q3	0.001508
			max	0.071188				max	0.028354
		SIM	median	0.000842			SIM	median	0.002187
			confidence interval	[ 0.000551 , 0.001380 ]				confidence interval	[ 0.001135 , 0.003808 ]
			min	0.000109				min	0.000349
			Q1	0.000406				Q1	0.000744
			Q3	0.001327				Q3	0.004972
			max	0.034768				max	0.01285
		FFL	median	0.001441			FFL	median	0.001396
			confidence interval	[ 0.001332 , 0.001551 ]				confidence interval	[ 0.001292 , 0.001457 ]
			min	9.3e-05				min	0.00036
			Q1	0.000496				Q1	0.000695
			Q3	0.00282				Q3	0.002159
			max	0.027933				max	0.012608
	MM22	TRN	median	0.000933		Rif	TRN	median	0.0010822
			confidence interval	[ 0.000898 , 0.000976 ]				confidence interval	[ 0.001032 , 0.001061 ]
			min	5.3e-05				min	0.000118
			Q1	0.000405				Q1	0.000731
			Q3	0.001514				Q3	0.001359
			max	0.052298				max	0.015509
		SIM	median	0.000892			SIM	median	0.001261
			confidence interval	[ 0.000633 , 0.001263 ]				confidence interval	[ 0.001089 , 0.001604 ]
			min	0.000108				min	0.000288
			Q1	0.000481				Q1	0.000912
			Q3	0.001315				Q3	0.001634
			max	0.031025				max	0.010206
		FFL	median	0.001438			FFL	median	0.0010824
			confidence interval	[ 0.001384 , 0.001522 ]				confidence interval	[ 0.001052 , 0.001102 ]
			min	0.000132				min	0.000274
			Q1	0.000588				Q1	0.000832
			Q3	0.002823				Q3	0.001308
			max	0.01828				max	0.005764
	MM30	TRN	median	0.000773
			confidence interval	[ 0.000738 , 0.000812 ]
			min	2.8e-05
			Q1	0.000245
			Q3	0.001504
			max	0.053904
		SIM	median	0.000841
			confidence interval	[ 0.000535 , 0.001331 ]
			min	0.000165
			Q1	0.00027
			Q3	0.001315
			max	0.021403
		FFL	median	0.001511
			confidence interval	[ 0.001378 , 0.001646 ]
			min	0.000139
			Q1	0.000431
			Q3	0.003289
			max	0.024547
	sMM30	TRN	median	0.001027
			confidence interval	[ 0.000985 , 0.001048 ]
			min	6.7e-05
			Q1	0.000508
			Q3	0.001662
			max	0.030617
		SIM	median	0.000951
			confidence interval	[ 0.000771 , 0.001197 ]
			min	0.000358
			Q1	0.000557
			Q3	0.001313
			max	0.022409
		FFL	median	0.001314
			confidence interval	[ 0.001298 , 0.001408 ]
			min	0.00024
			Q1	0.000736
			Q3	0.002155
			max	0.01163
Q1: The first quartile (Q1), also known as the "smaller quartile", is equal to the 25th percentile of all values in the sample from small to large.
Q3: The third quartile (Q3), also known as the "larger quartile", is equal to the 75% figure after all the values in the sample are arranged from small to large.
Confidence interval: 95% confidence interval.
